# Supplementary material for: Genomic insight into balancing high yield, good quality, and blast resistance of japonica rice
Source: PubMed Central journal article supplement (PMC8493723; doi:10.1186/s13059-021-02488-8), 2021-10-06
Supplement: 13059_2021_2488_MOESM1_ESM.pdf [file 13059_2021_2488_MOESM1_ESM.pdf]

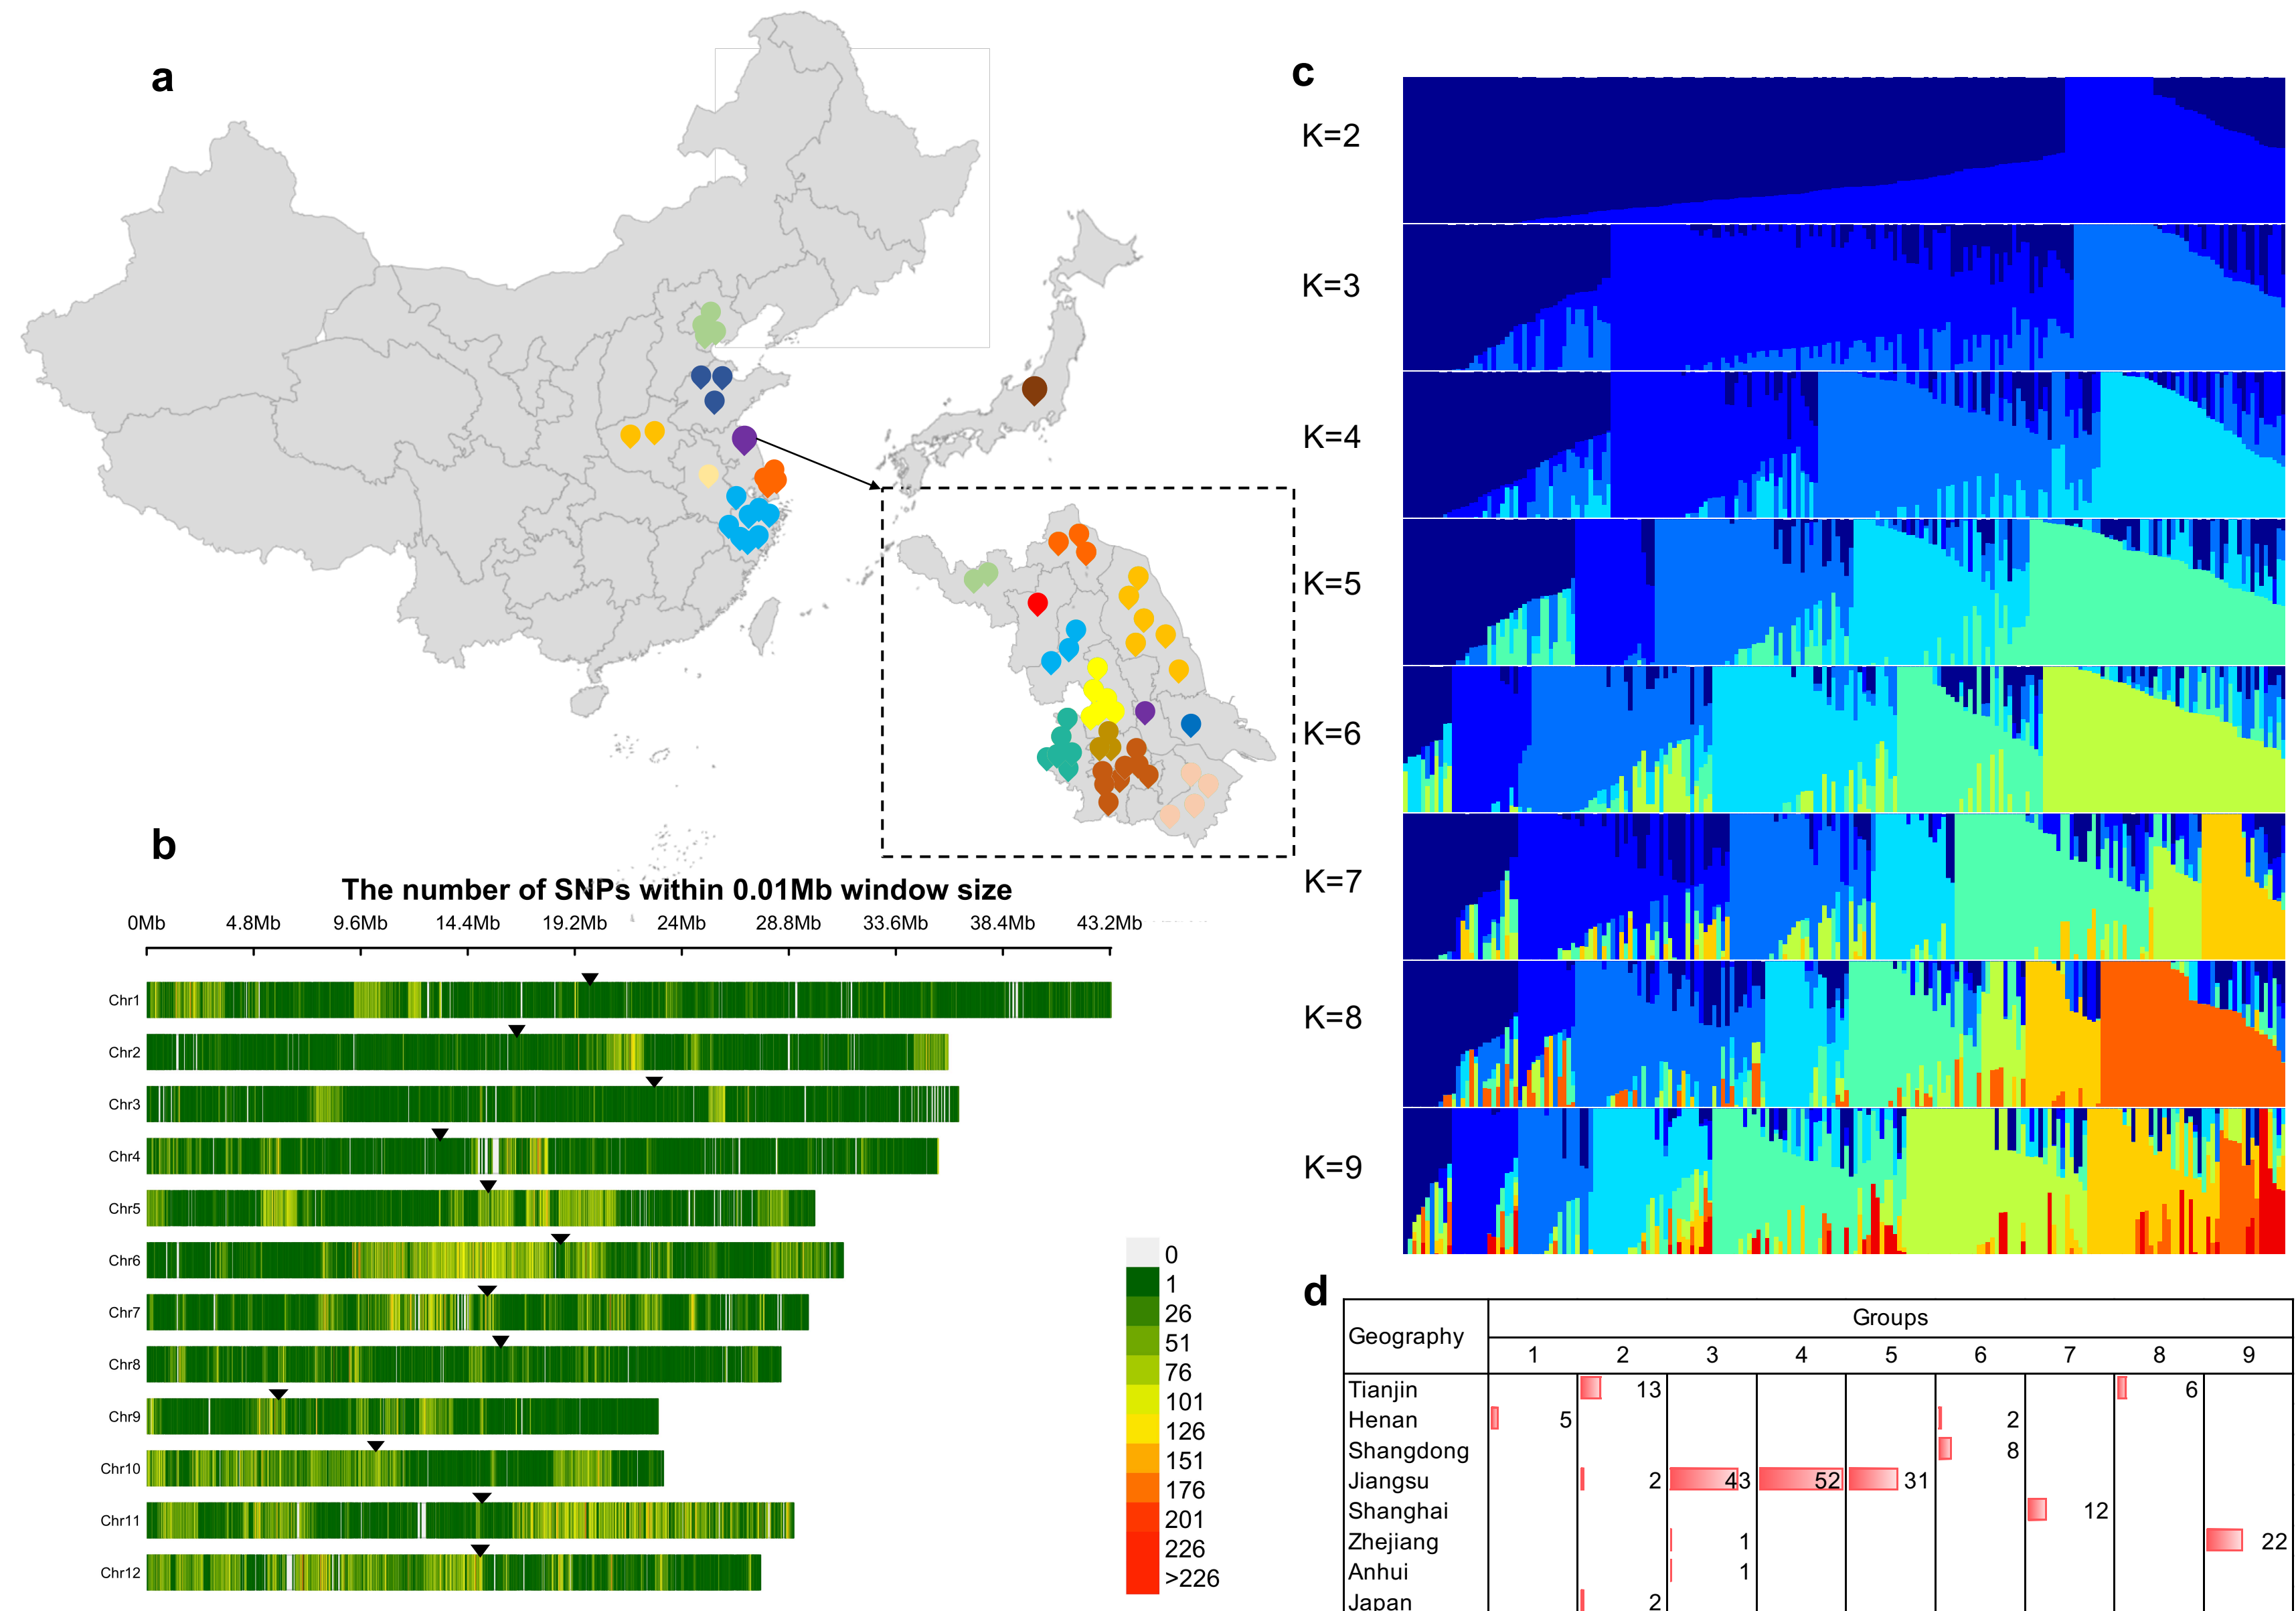

**Fig. S1 Geographical location and genetic structure of the 200 re-sequenced *japonica* varieties**

**a** Geographical location of re-sequenced *japonica* rice varieties in central China. The control variety from Japan was *Nipponbare*. The geographical location of the varieties is marked with colored dots, and a colored dot represents no more than three varieties. **b** The single nucleotide polymorphisms (SNPs) obtained by re-sequencing ( $15\times$  sequencing depth) of the 200 *japonica* rice varieties uniformly covered the whole chromosomes of rice and minor allele frequency (MAF)  $< 0.05$ . Approximately 600,000 SNP markers were randomly selected for plotting. Black triangles represent the centromere location. **c** Population structure of the 200 re-sequenced varieties according to ADMIXTURE analysis. **d** Distribution of varieties from different geographical locations in each genetic group.

GW

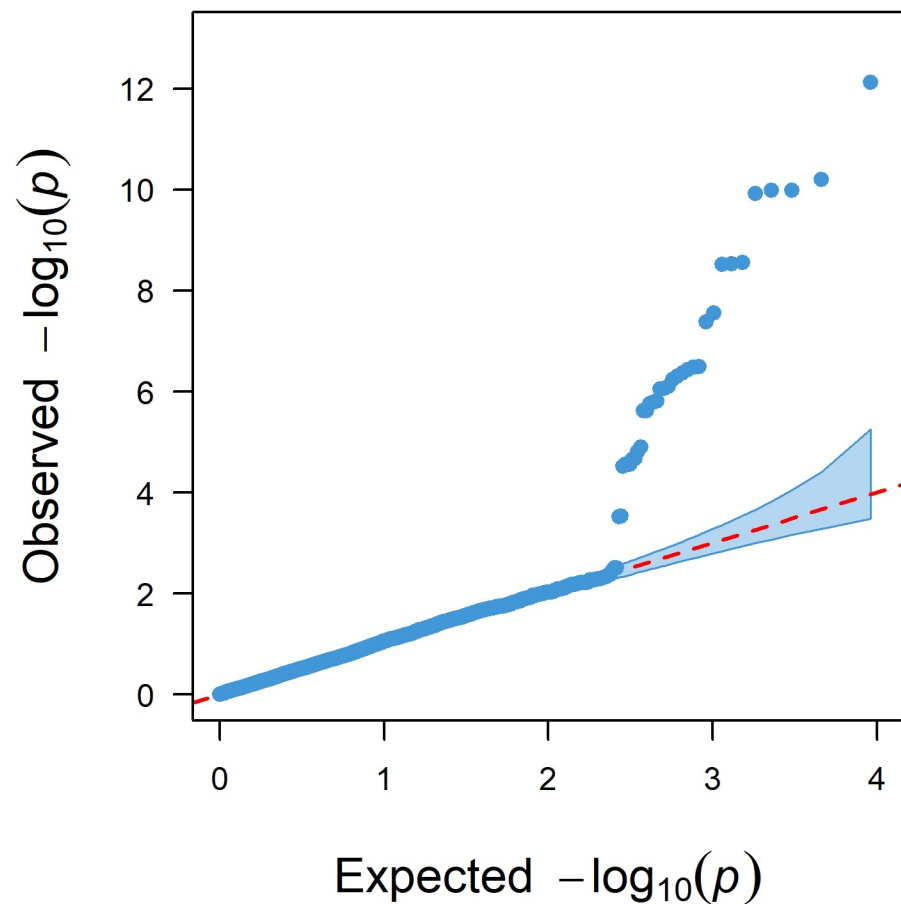

GN

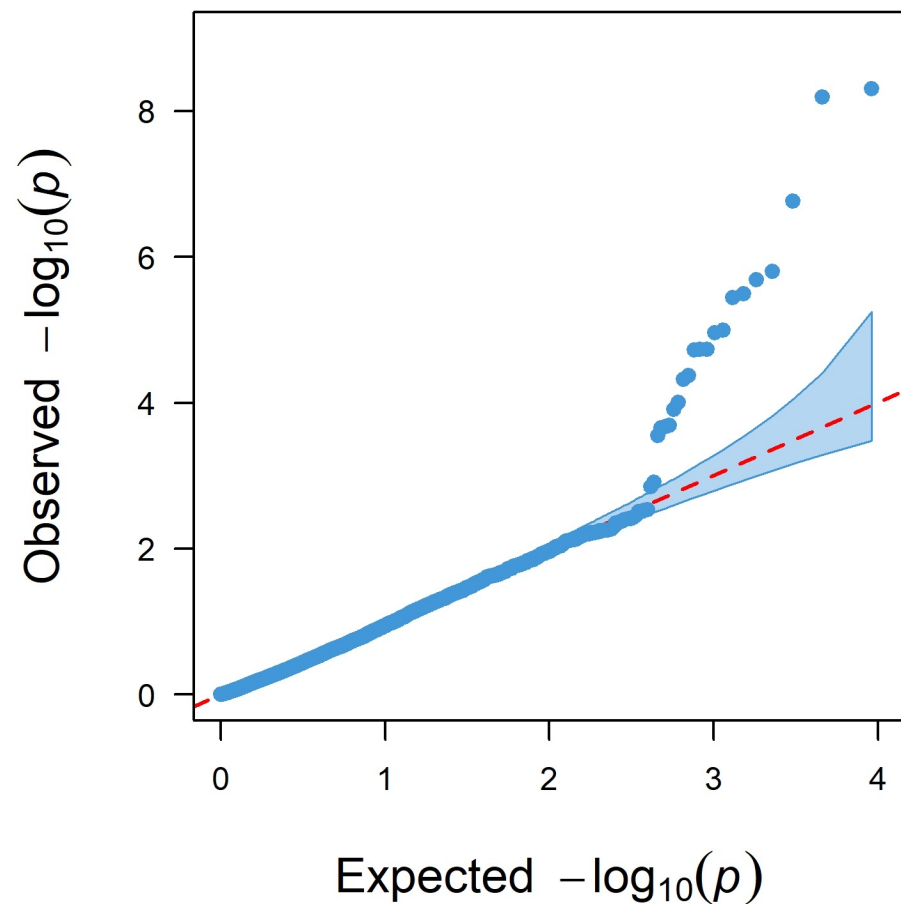

PN

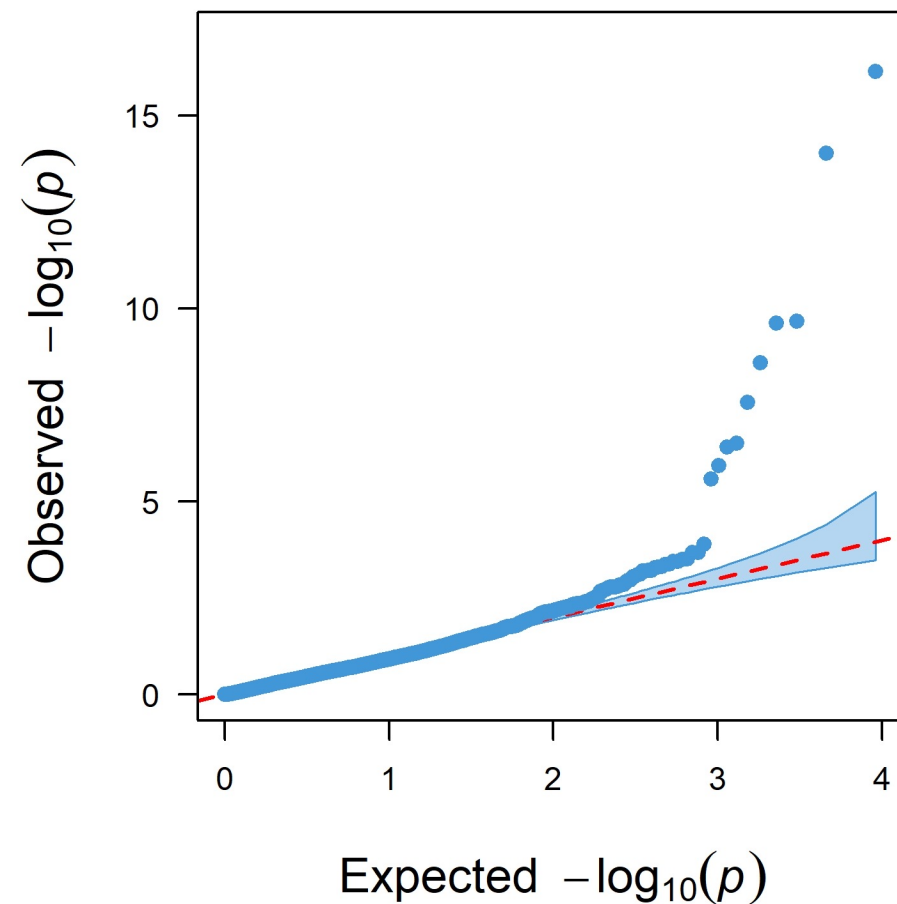

**Fig. S2 Quantile-quantile plots relate to genome-wide association studies of yield related traits**

GW, 1000-grain weight (unit: g); PN, panicle number per plant; GN, grain number; AC, amylose content (unit: %).



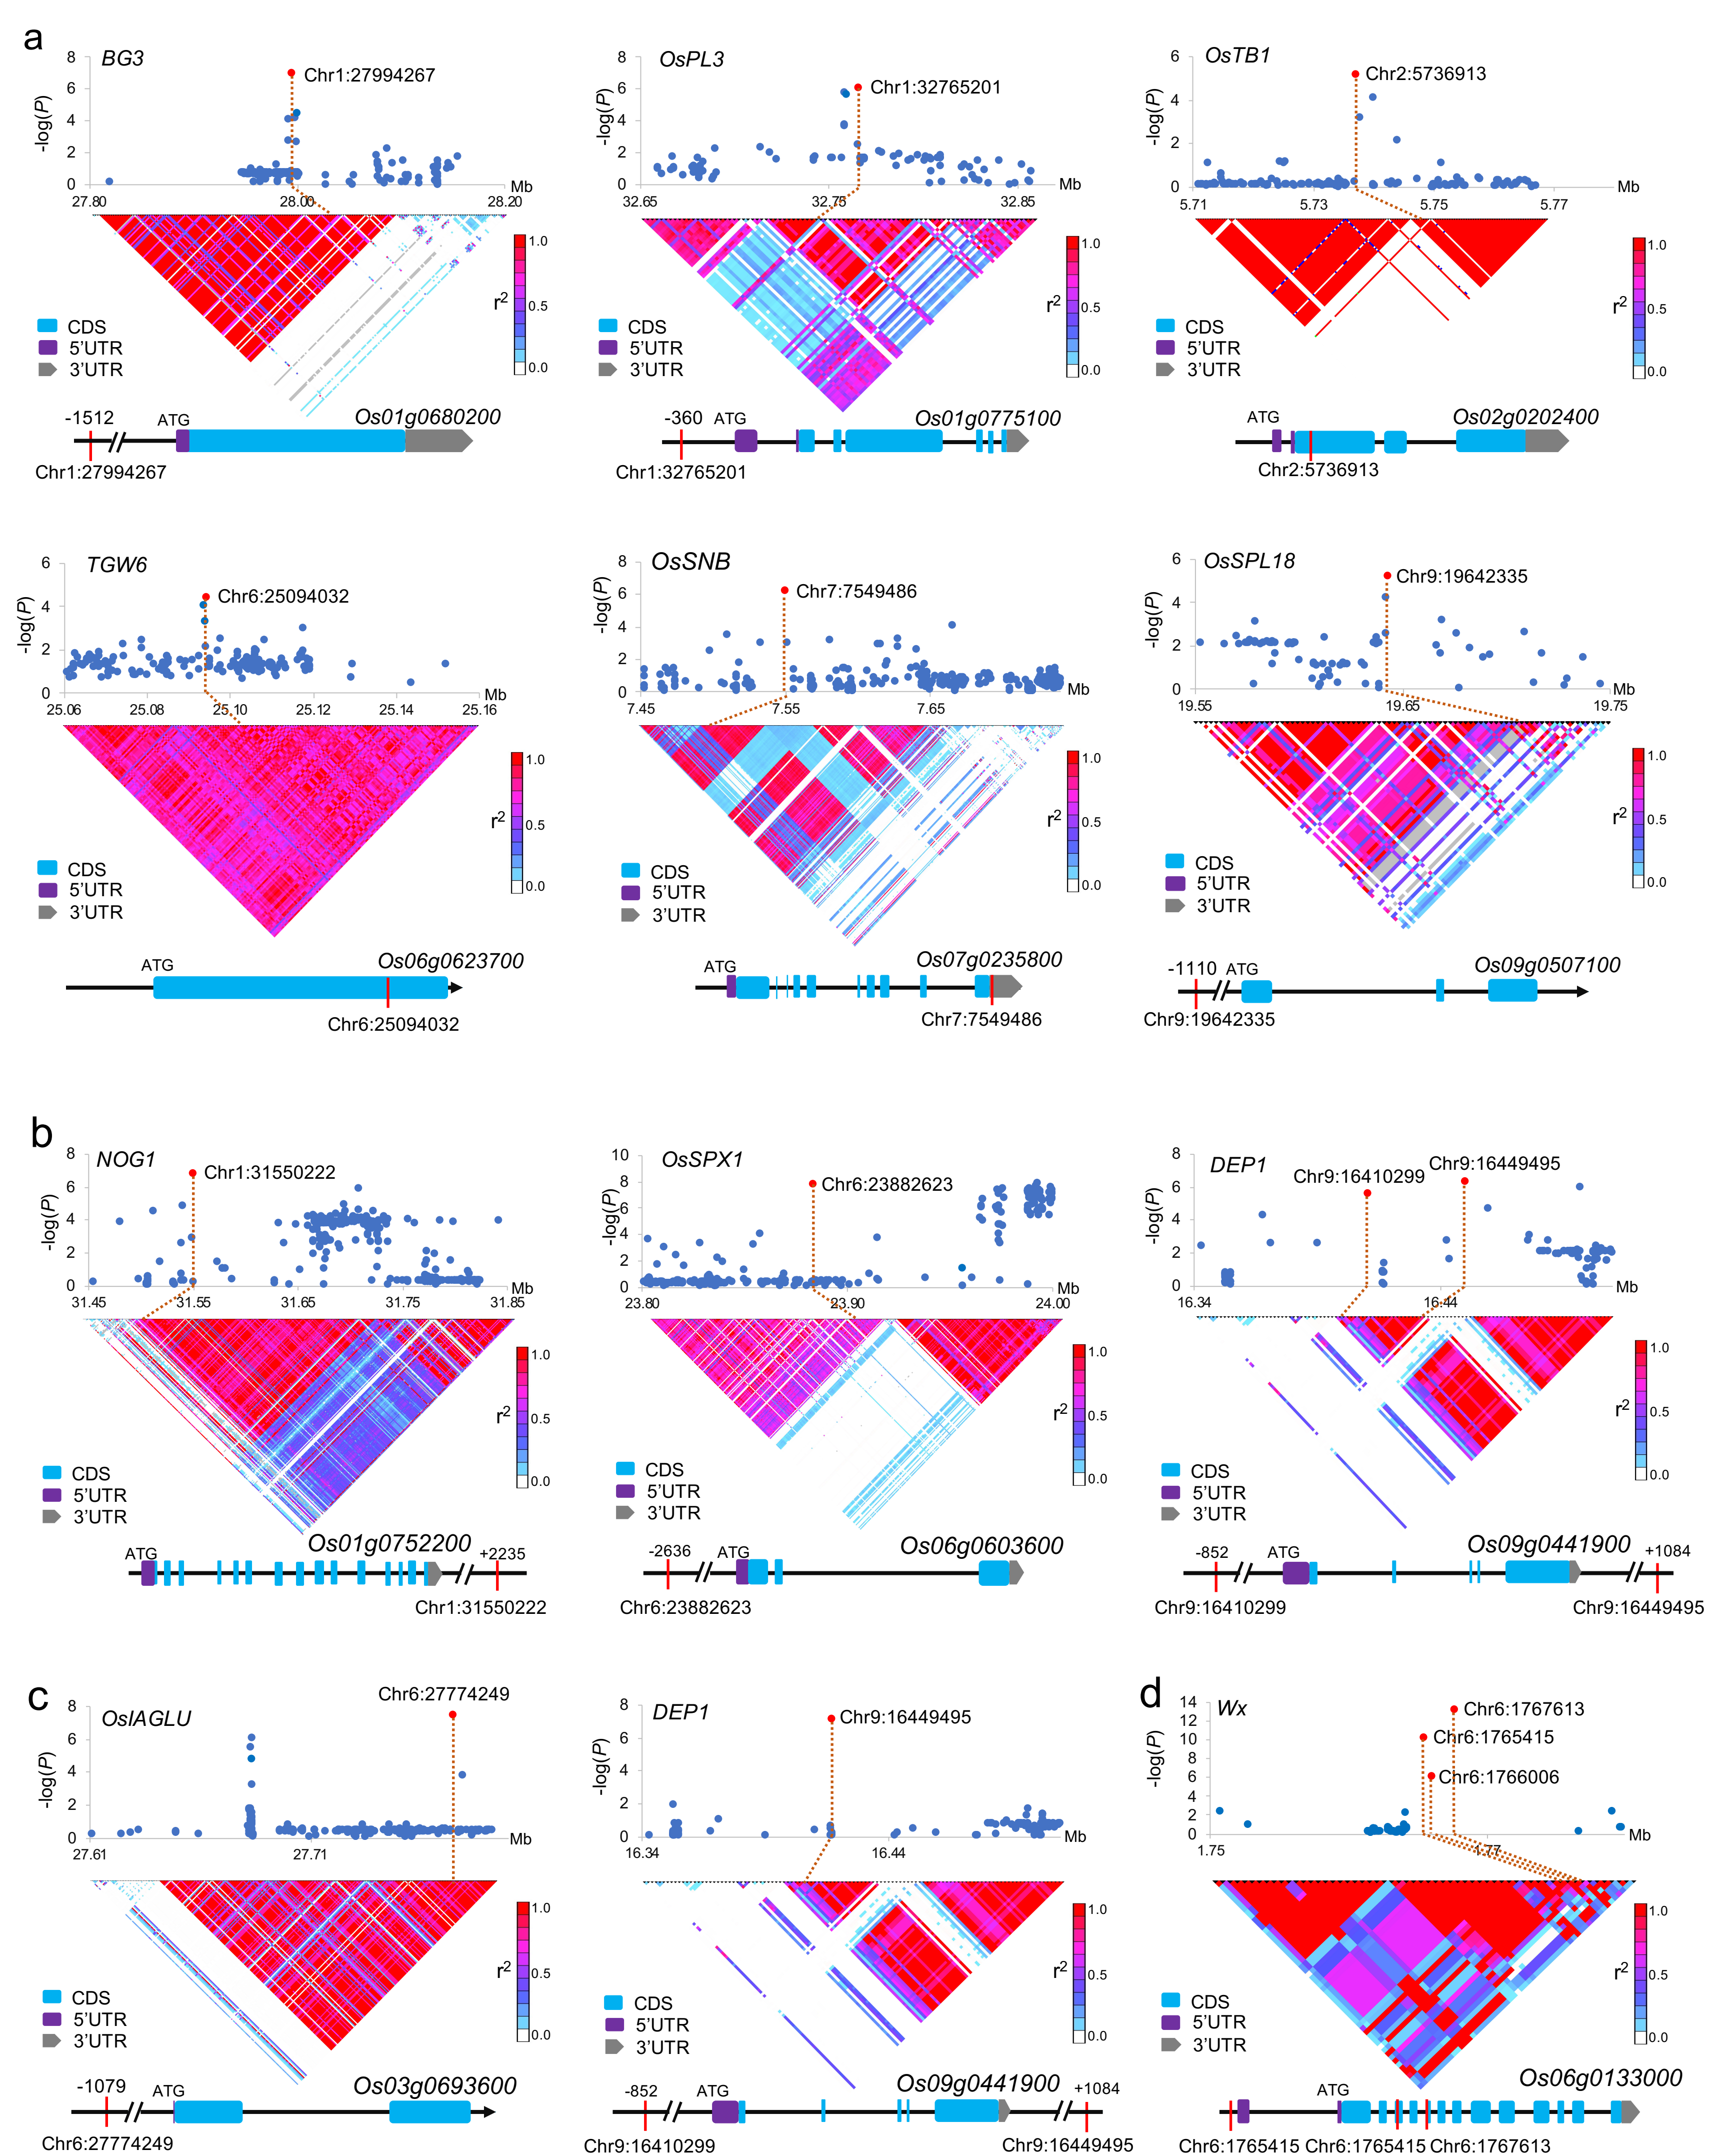



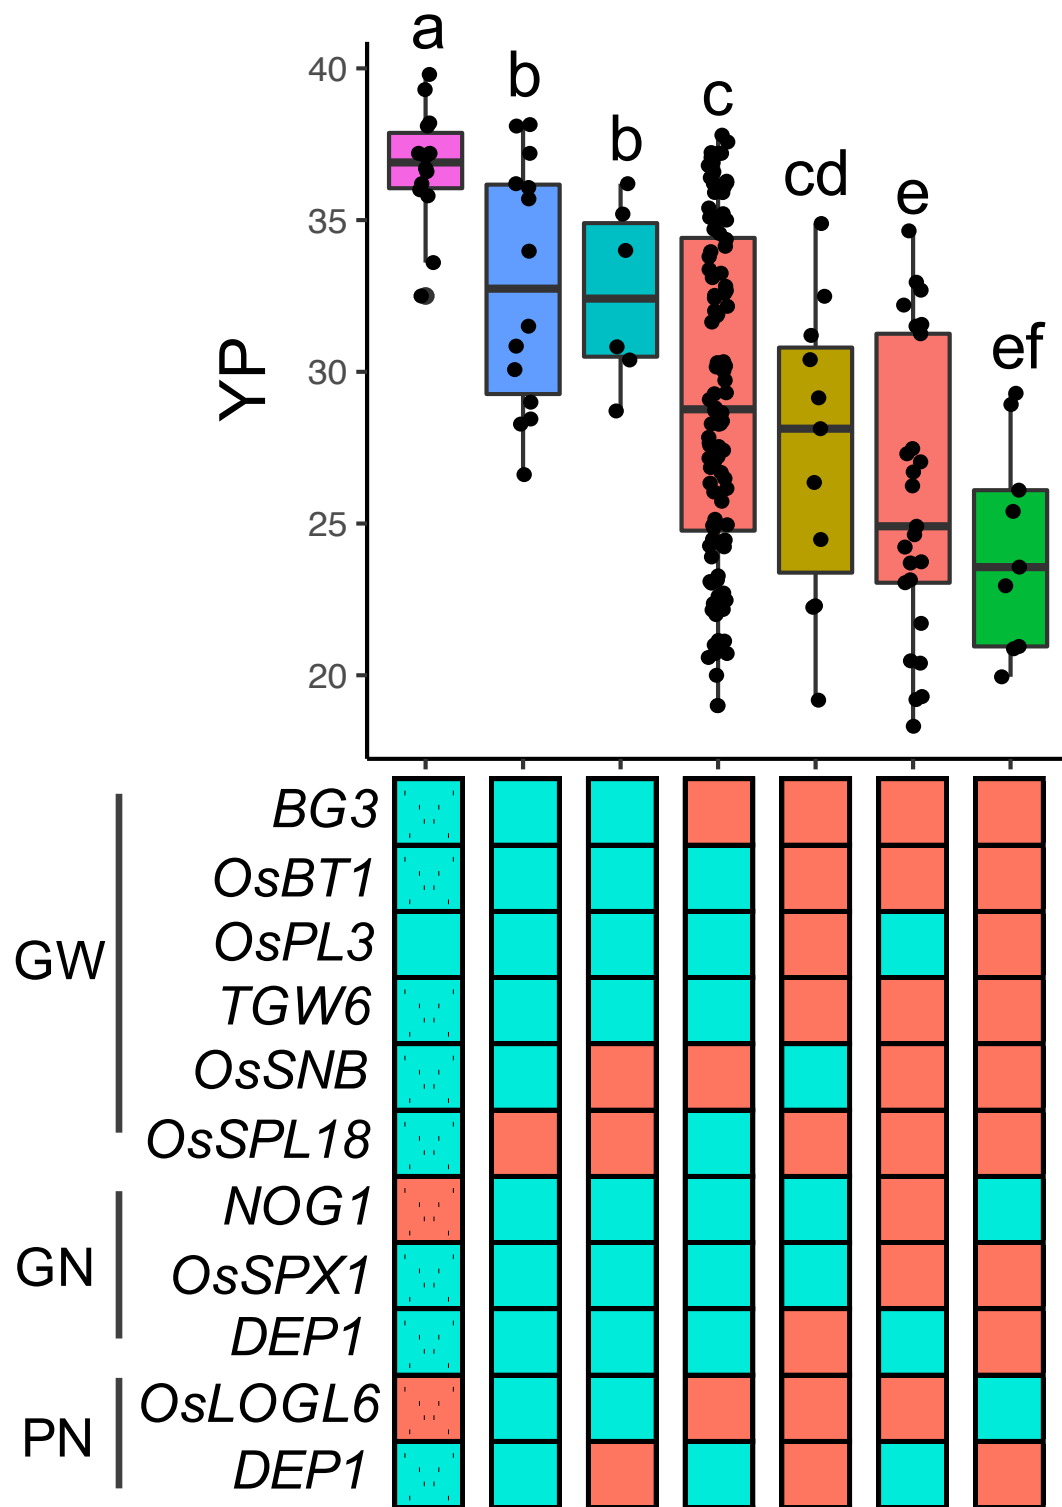

**Fig. S4 Gene combinations contribute to yield level**

Effects of gene combinations of grain weight (*BG3*, *OsBT1*, *OsPL3*, *TGW6*, *OsSNB*, and *OsSPL18*), grain number (*NOG1*, *OsSPX1*, and *DEP1*), and panicle number (*OsIAGLU* and *DEP1*) on yield traits; different letters indicate significant differences ( $P < 0.05$  by Tukey's HSD test). Light blue represents the superior allele, and orange represents the inferior allele.

**a**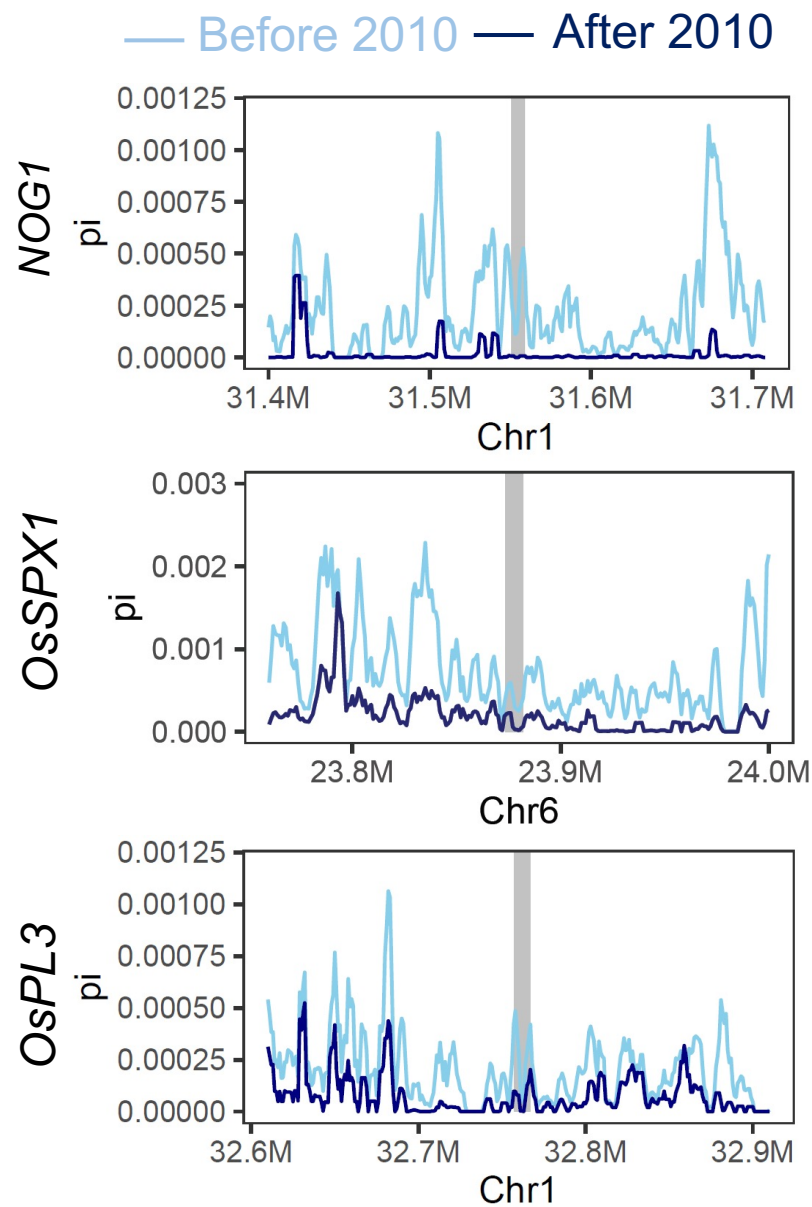**b**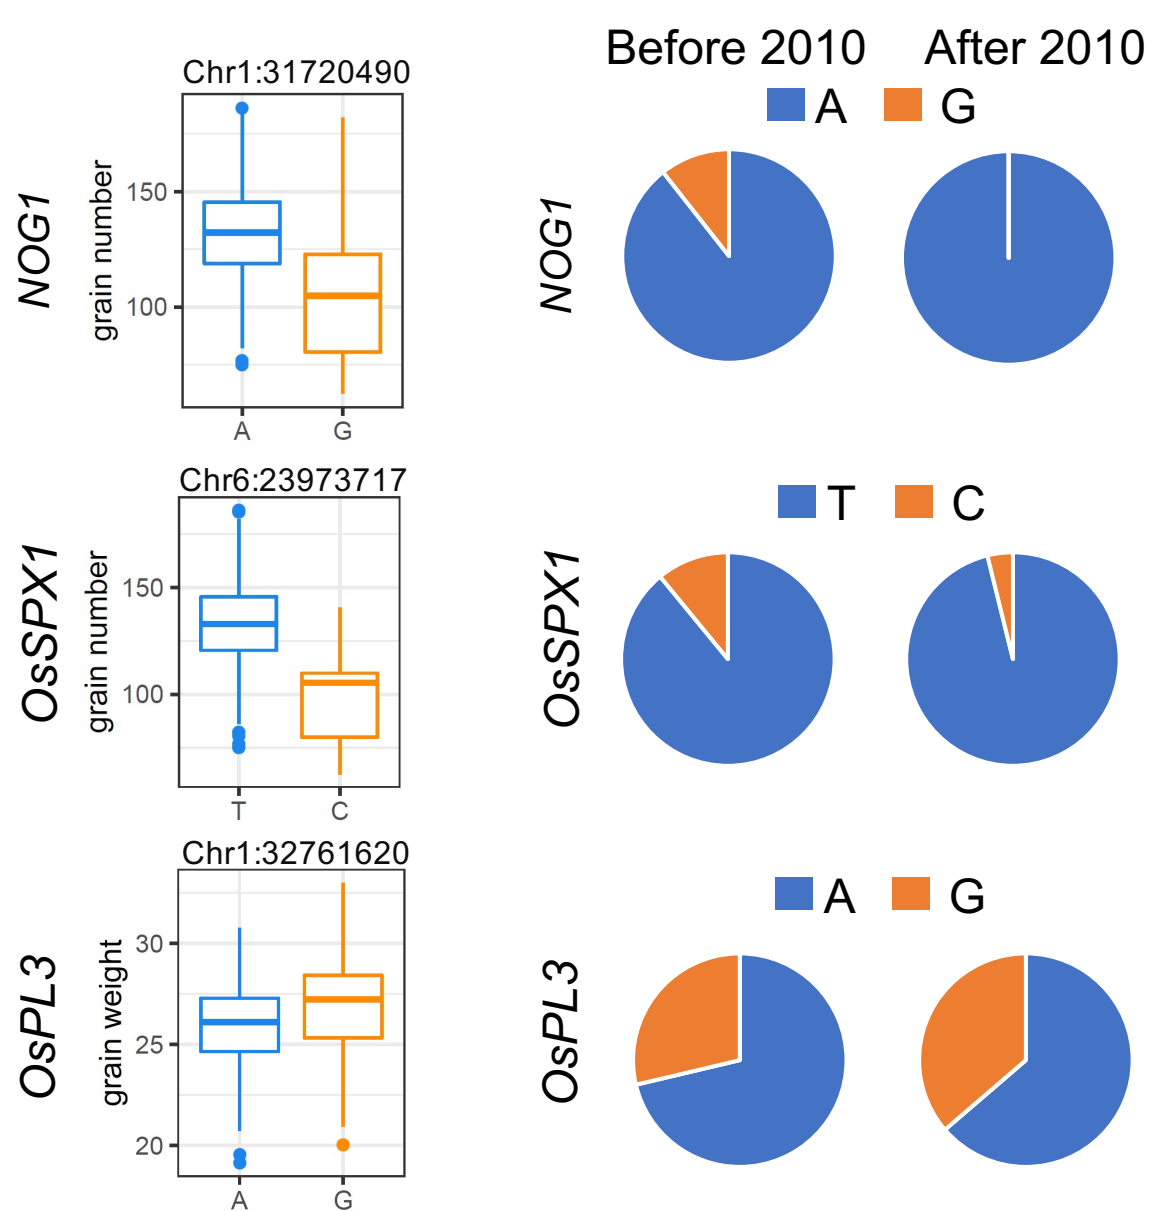

**Fig. S5 Artificial selection trend of GWAS mapped genes**

**a** Nucleotide diversity ( $\pi$ ) near *OsPL3*, *NOG1*, and *OsSPX1* and favorable allelic genotype analysis: The  $\pi$  values of chromosome regions near *NOG1*, *OsSPX1*, and *OsPL3* showed a downward trend. **b** Grain number and grain weight in varieties carrying different SNPs in *NOG1*, *OsSPX1* and *OsPL3*. Excellent allelic variants of *NOG1*<sup>A</sup>, *OsSPX1*<sup>T</sup>, and *OsPL3*<sup>G</sup> showed an accumulation trend in the population after 2010.



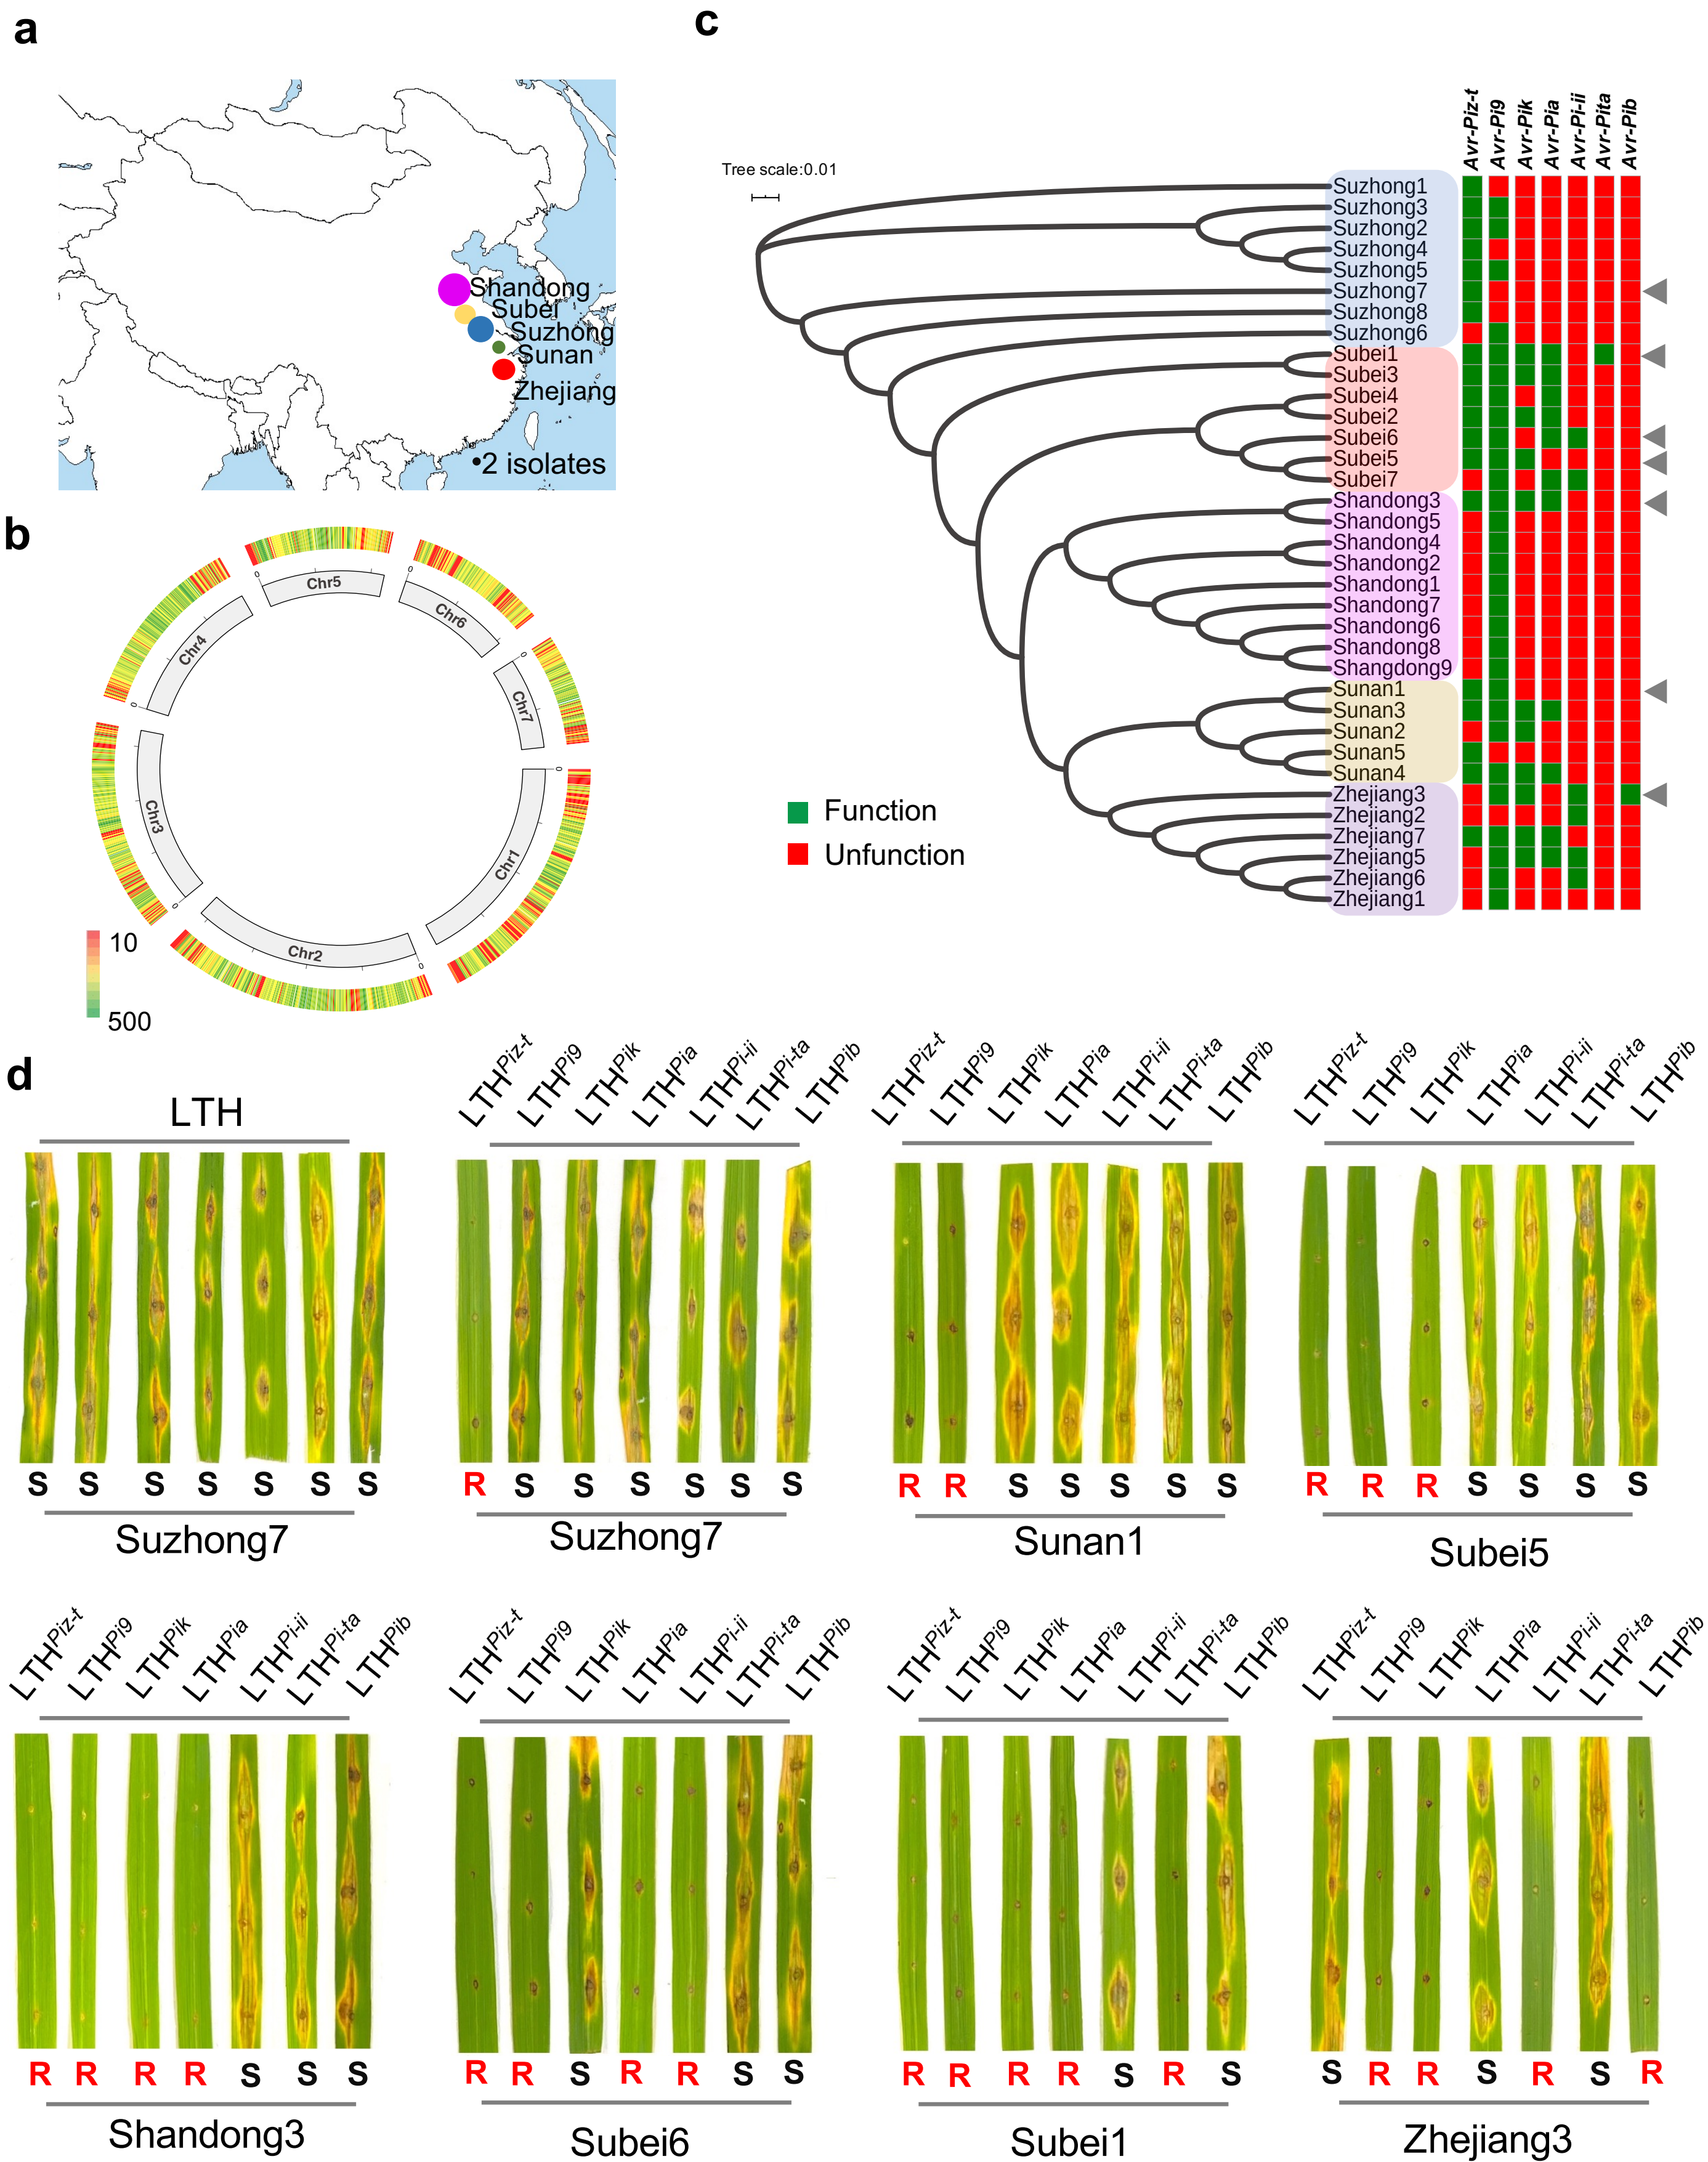

**Fig. S6 Genetic diversity analysis and selection of representative isolates of blast**

**a** Geographical location of 36 isolates of *Magnaporthe oryzae* collected; **b** A total of 85,335 SNPs obtained from 36 isolates of *M. oryzae* by sequencing at 30 $\times$  sequencing depth. The reference genome was *M. oryzae* (70-15), and SNPs were filtered based on a minor allele frequency (MAF) > 0.05. **c** Genome-wide SNP markers were used to classify the genetic groups of the 36 sequenced isolates and identify the functional avirulence genes among these isolates. Green represents no mutation in the avirulence genes, red represents deletions or insertions that caused unfunctional mutations in the avirulence genes, and gray arrows represent the selected representative isolates used to assess the blast resistance of the *japonica* varieties. **d** Seedling blast phenotype of monogenic lines of *Pi2*, *Pi9*, *Piz-t*, *Pik*, *Pia*, *Pi-ii*, and *Pi-ta* infected by seven selected isolates. All monogenic lines had the same genetic background (Heigu of Lijiang Xintuan; LHT), R blast resistance phenotype with blast spot diameter < 1 cm, S sensitive phenotype with blast spot diameter > 2 cm.



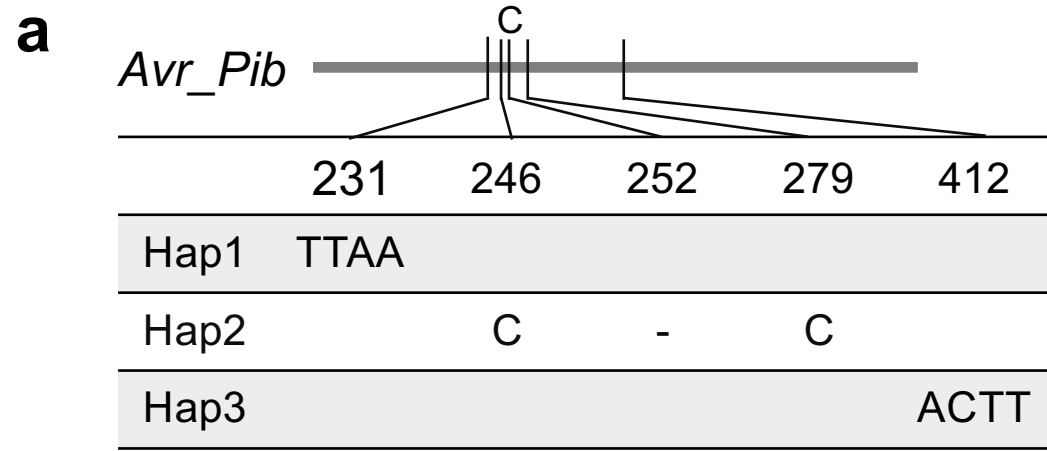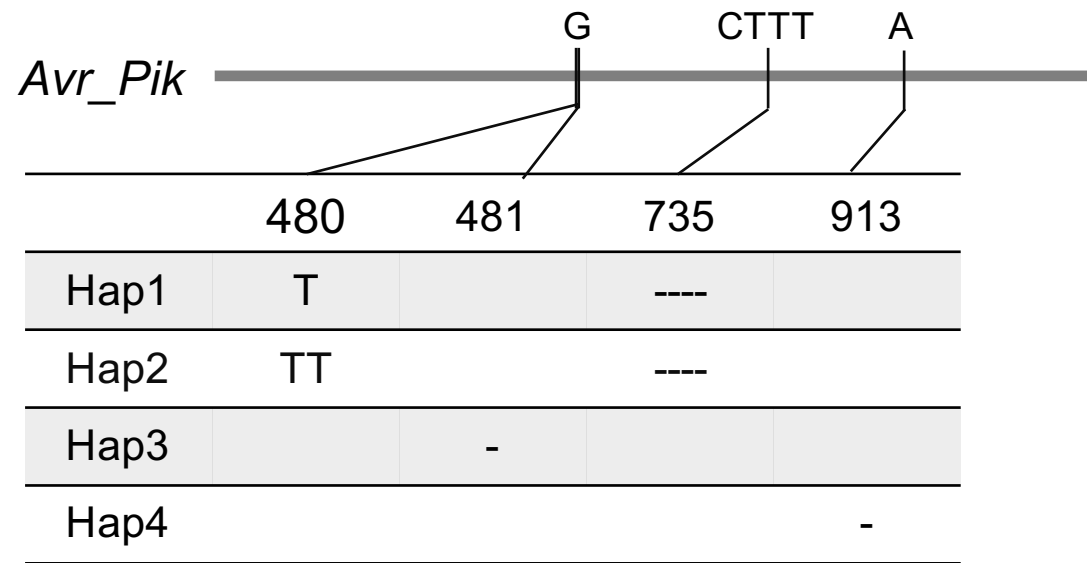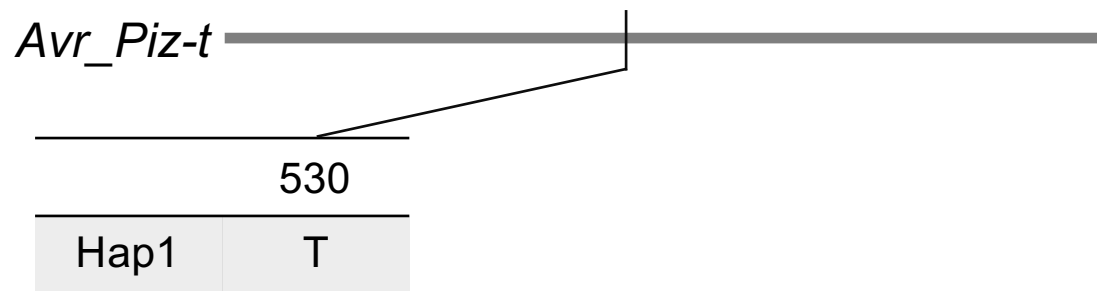

**b**

| Isolate name | <i>Avr_Pi-9</i> | <i>Avr_Pi-a</i> | <i>Avr_Pi-ii</i> | <i>Avr_Pi-z<sup>t</sup></i> | <i>Avr_Pi-k</i> | <i>Avr_Pi-ta</i> | <i>Avr_Pi-b</i> |
|--------------|-----------------|-----------------|------------------|-----------------------------|-----------------|------------------|-----------------|
| Suzhong1     |                 |                 |                  | +                           | Hap3            |                  | hap2            |
| Suzhong3     | +               |                 |                  | +                           | Hap3            |                  | hap2            |
| Suzhong2     | +               |                 |                  | +                           | Hap3            |                  | Hap1            |
| Suzhong4     |                 |                 |                  | +                           | Hap3            |                  | Hap1            |
| Suzhong5     | +               |                 |                  | +                           | Hap3            |                  | hap2            |
| Suzhong7     |                 |                 |                  | +                           | Hap3            |                  | hap2            |
| Suzhong8     |                 |                 |                  | +                           | Hap3            |                  | hap2            |
| Suzhong6     | +               |                 |                  | Hap1                        | Hap3            |                  | hap2            |
| Subei1       | +               | +               |                  | +                           | +               | +                | Hap1            |
| Subei3       | +               | +               |                  | +                           | +               |                  | Hap1            |
| Subei4       | +               | +               |                  | +                           | Hap1            |                  | Hap1            |
| Subei2       | +               | +               |                  | +                           | +               |                  | Hap1            |
| Subei6       | +               | +               | +                | +                           | Hap1            |                  | Hap1            |
| Subei5       | +               |                 |                  | +                           | +               |                  | Hap1            |
| Subei7       | +               | +               | +                | Hap1                        | Hap2            |                  | Hap1            |
| Shandong3    | +               | +               |                  | +                           | +               |                  | Hap1            |
| Shandong5    | +               |                 |                  | Hap1                        | Hap2            |                  | Hap1            |
| Shandong4    | +               |                 |                  | Hap1                        | Hap2            |                  | Hap1            |
| Shandong2    | +               |                 |                  | Hap1                        | Hap2            |                  | Hap1            |
| Shandong1    | +               |                 |                  | Hap1                        | Hap1            |                  | Hap1            |
| Shandong7    | +               |                 |                  | Hap1                        | Hap2            |                  | Hap1            |
| Shandong8    | +               |                 |                  | Hap1                        | Hap1            |                  | Hap1            |
| Shandong6    | +               |                 |                  | Hap1                        | Hap2            |                  | Hap1            |
| Shandong9    | +               |                 |                  | Hap1                        | Hap2            |                  | Hap1            |
| Sunan1       | +               |                 |                  | +                           | Hap1            |                  | Hap3            |
| Sunan3       | +               | +               |                  | +                           | +               |                  | Hap3            |
| Sunan4       | +               | +               |                  | +                           | +               |                  | Hap3            |
| Sunan2       | +               |                 |                  | Hap1                        | +               |                  | Hap3            |
| Sunan5       |                 |                 |                  | +                           | Hap1            |                  | Hap3            |
| Zhejiang3    | +               |                 | +                | Hap1                        | +               |                  | +               |
| Zhejiang2    |                 |                 | +                | Hap1                        | Hap4            |                  | Hap3            |
| Zhejiang4    | +               |                 | +                | Hap1                        | Hap4            |                  | Hap3            |
| Zhejiang5    | +               | +               | +                | Hap1                        | +               |                  | Hap3            |
| Zhejiang6    | +               |                 | +                | Hap1                        | Hap1            |                  | Hap3            |
| Zhejiang1    | +               |                 |                  | Hap1                        | Hap1            |                  | Hap3            |
| Zhenjiang7   | +               | +               |                  | +                           | +               |                  | Hap3            |

**Fig. S7 The haplotypes of avirulence genes in 36 sequenced isolates**

**a** Identification of inserted and deleted sequences causing unfunctional mutations **b** Distribution of different haplotypes in the 36 sequenced isolates. +: The amplified sequence was consistent with cloned avirulence genes.

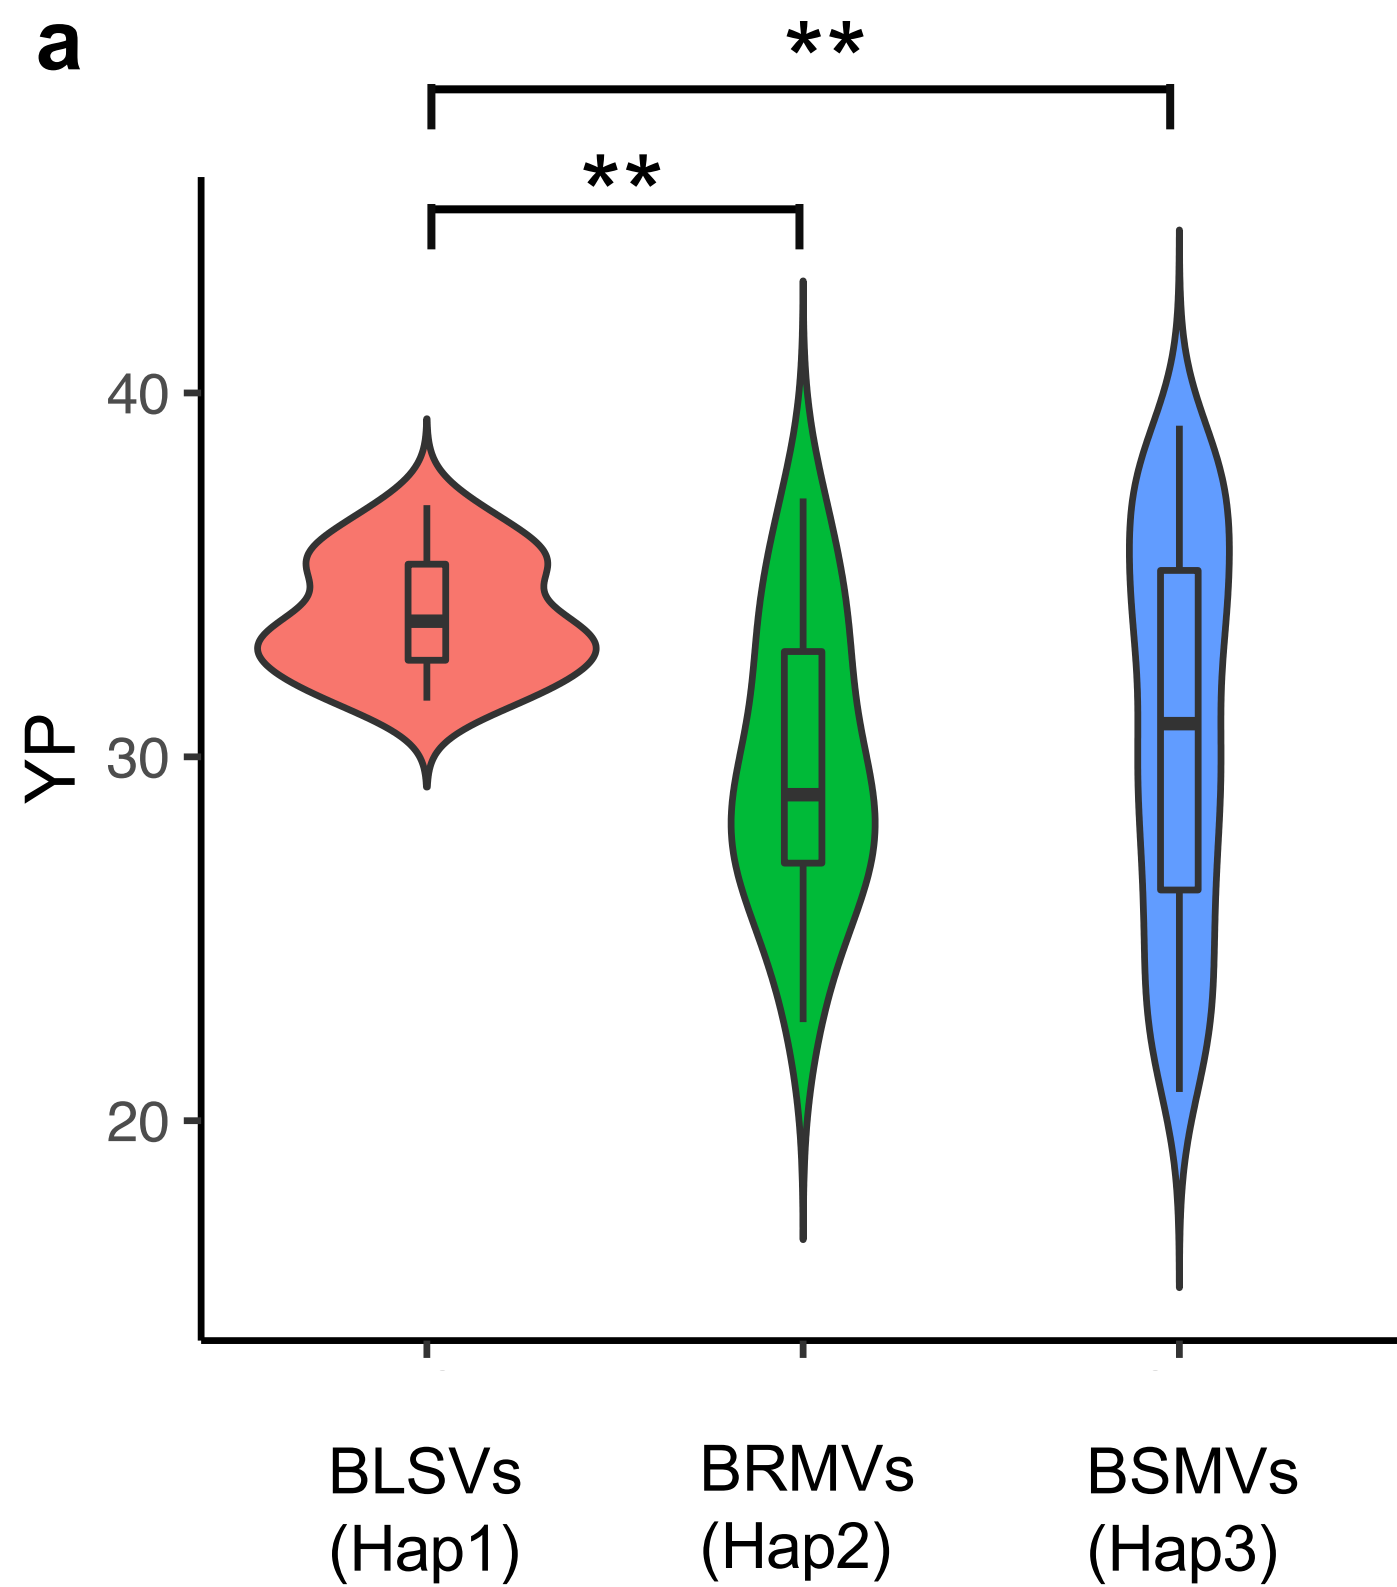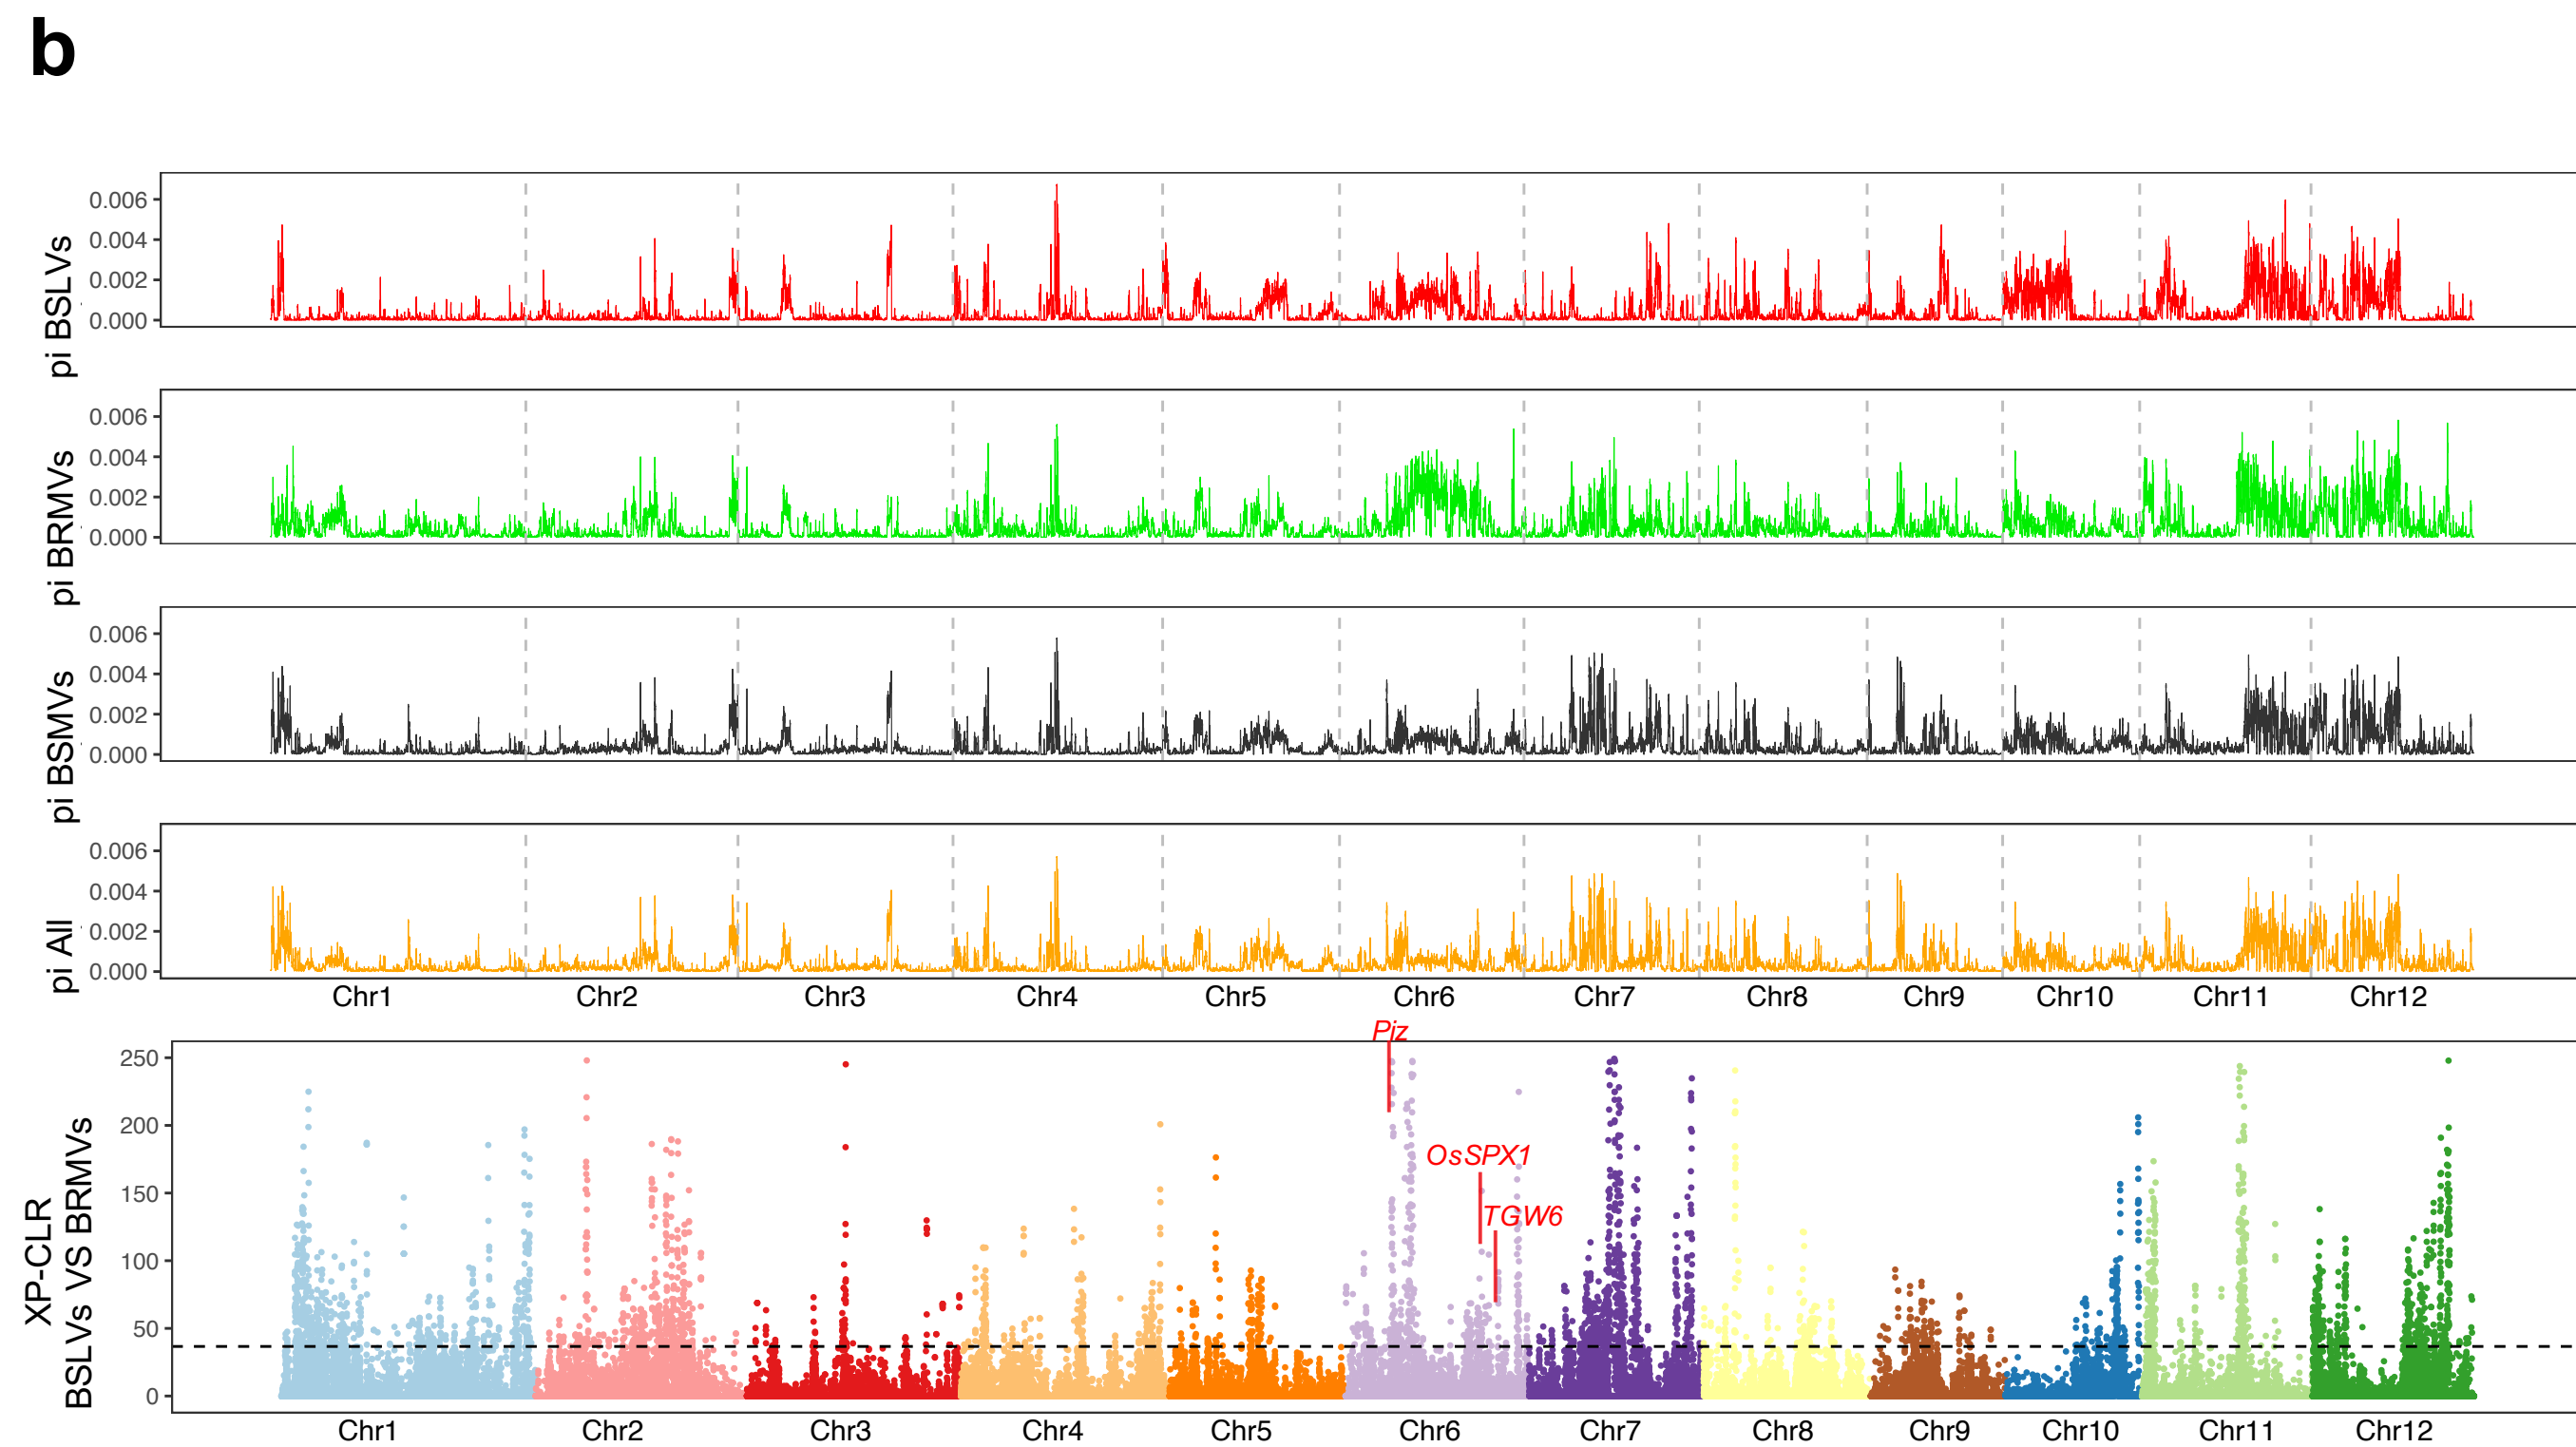

**Fig. S8 Yield decrease caused by Hap2 and artificial selection signals**

**a** Yield difference among BSLVs, BRMVs, and BSMVs, independent-samples  $t$ -test with  $P = 0.001$  level, \*\*: significant difference; **b** Genome-wide genetic diversity ( $\pi$ ) and cross-population composite likelihood ratio (XP-CLR) between BSLVs and BRMVs. *Piz* showed strong signals for selection between BSLVs and BRMVs. BSL; blast-sensitive and low-amylose (8–12%) varieties. BRM; blast-resistant and medium-amylose (13–18%) varieties.



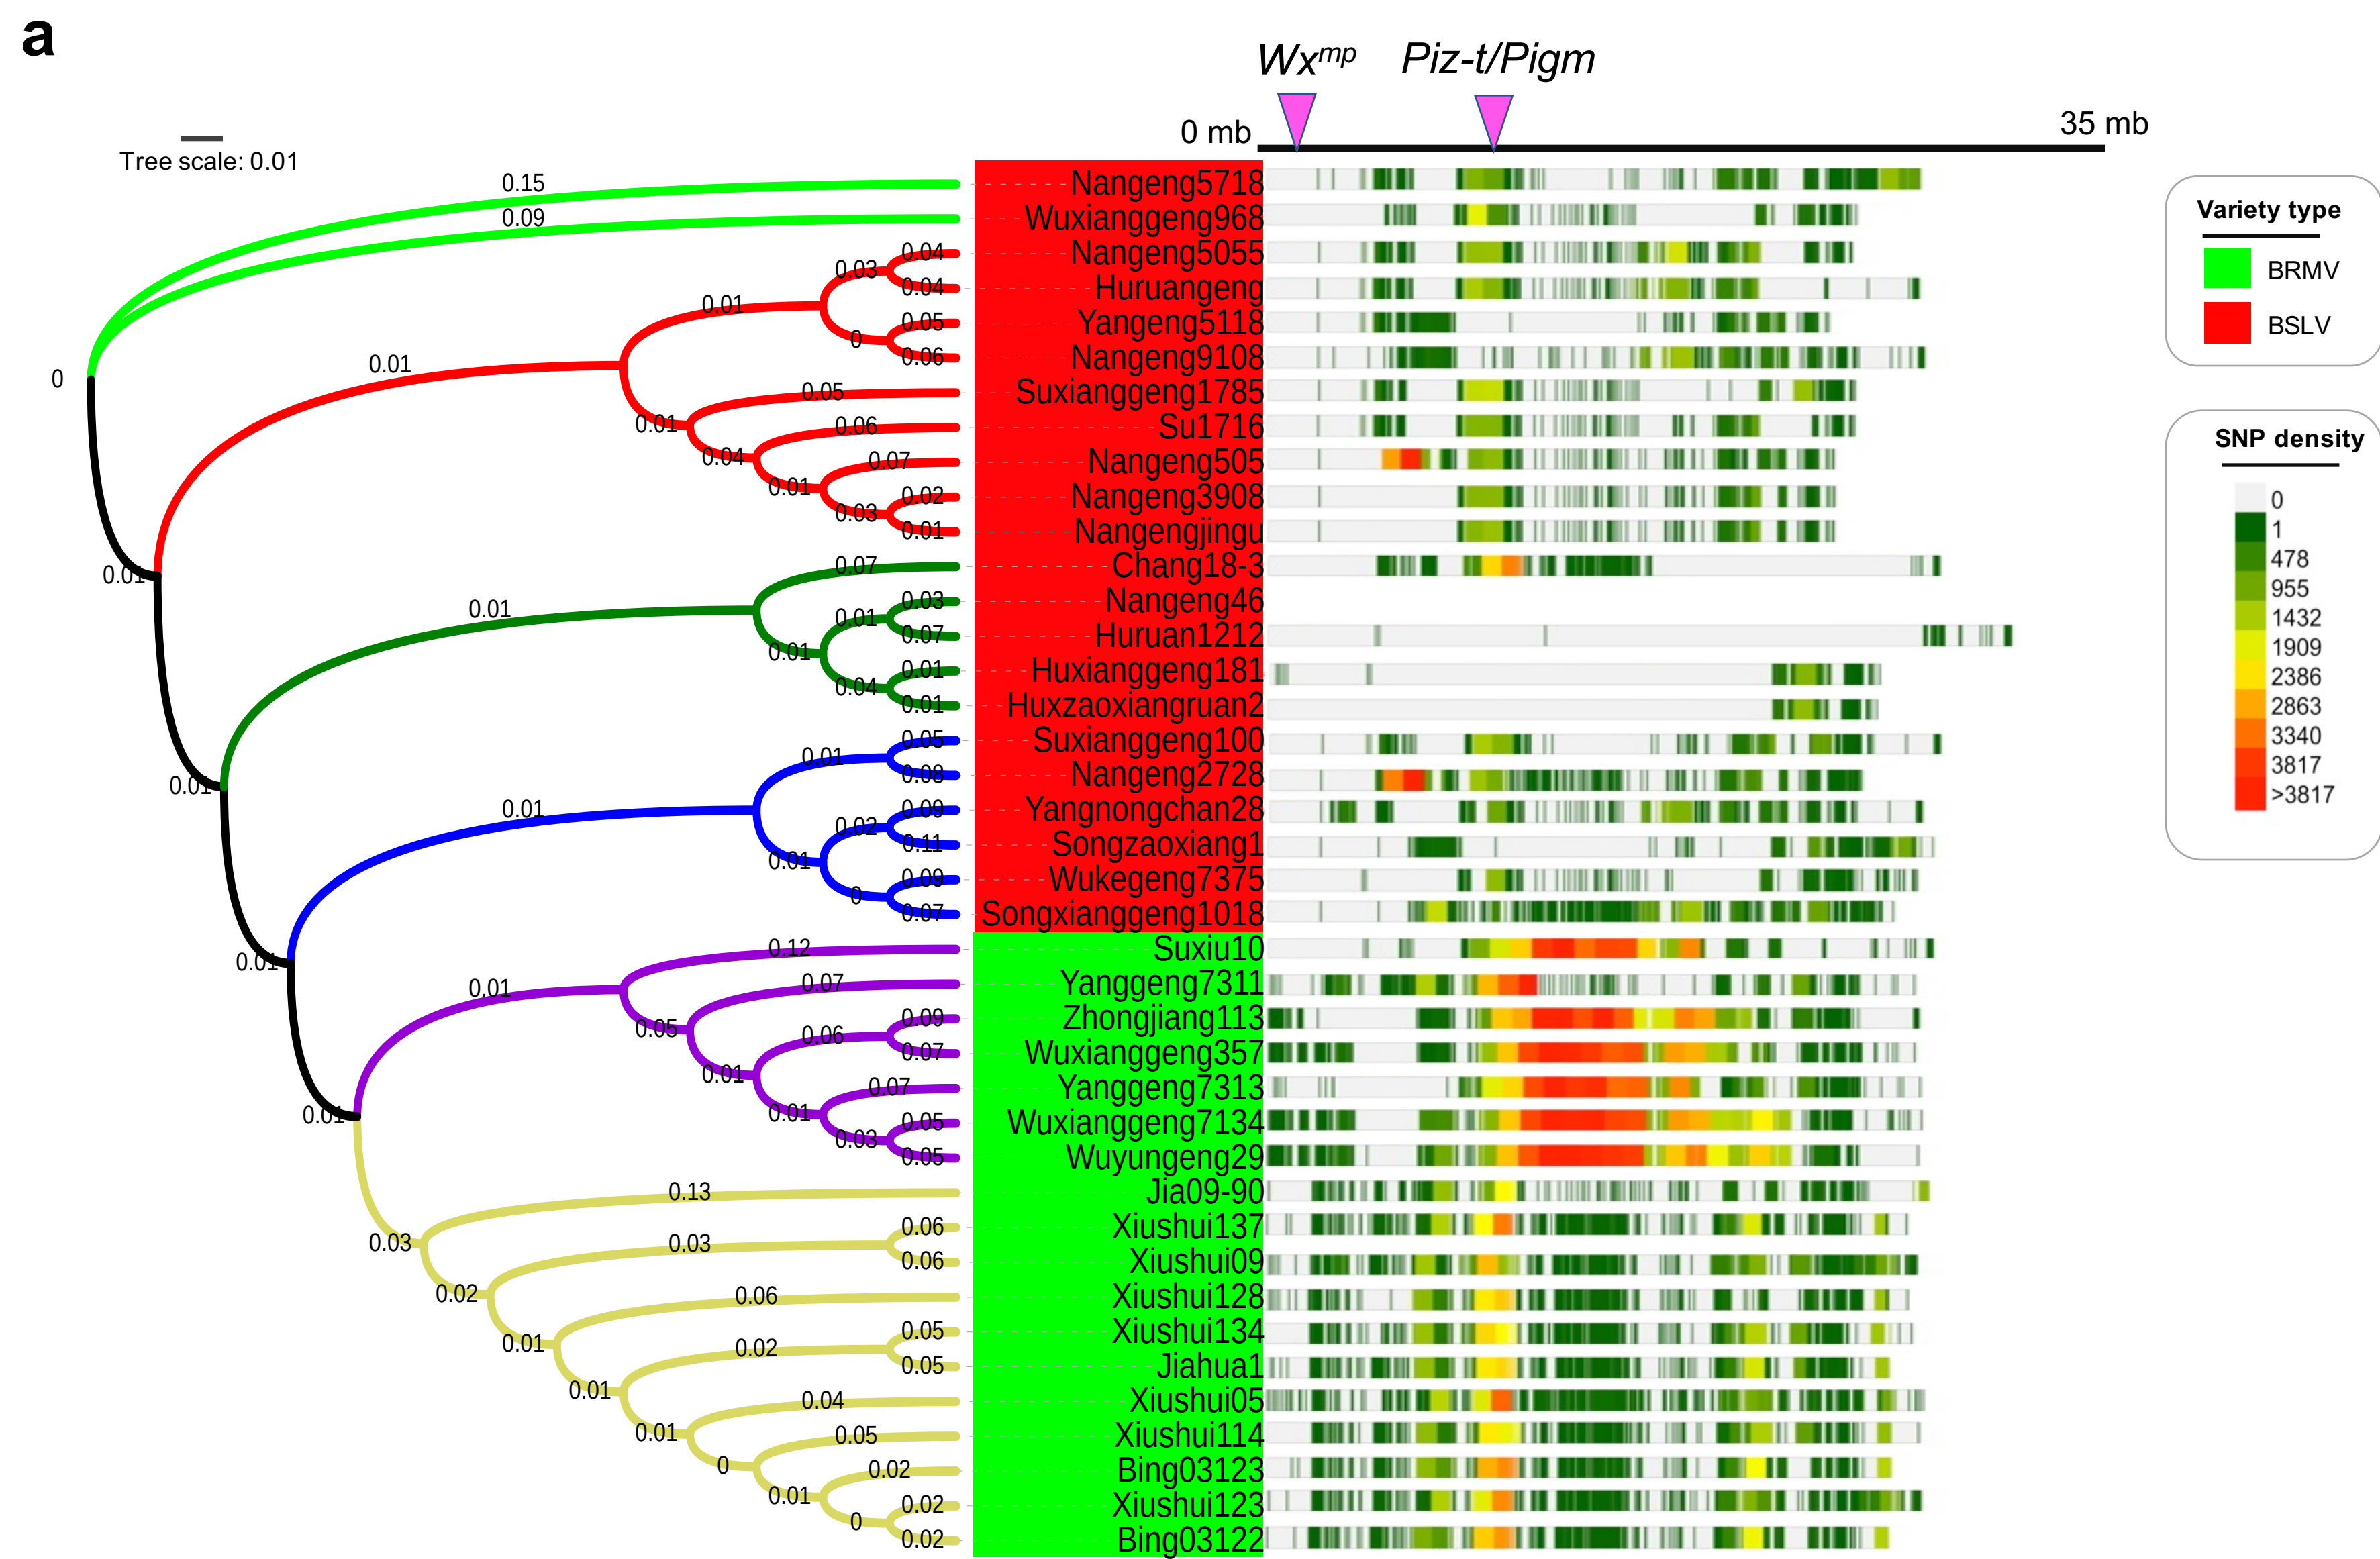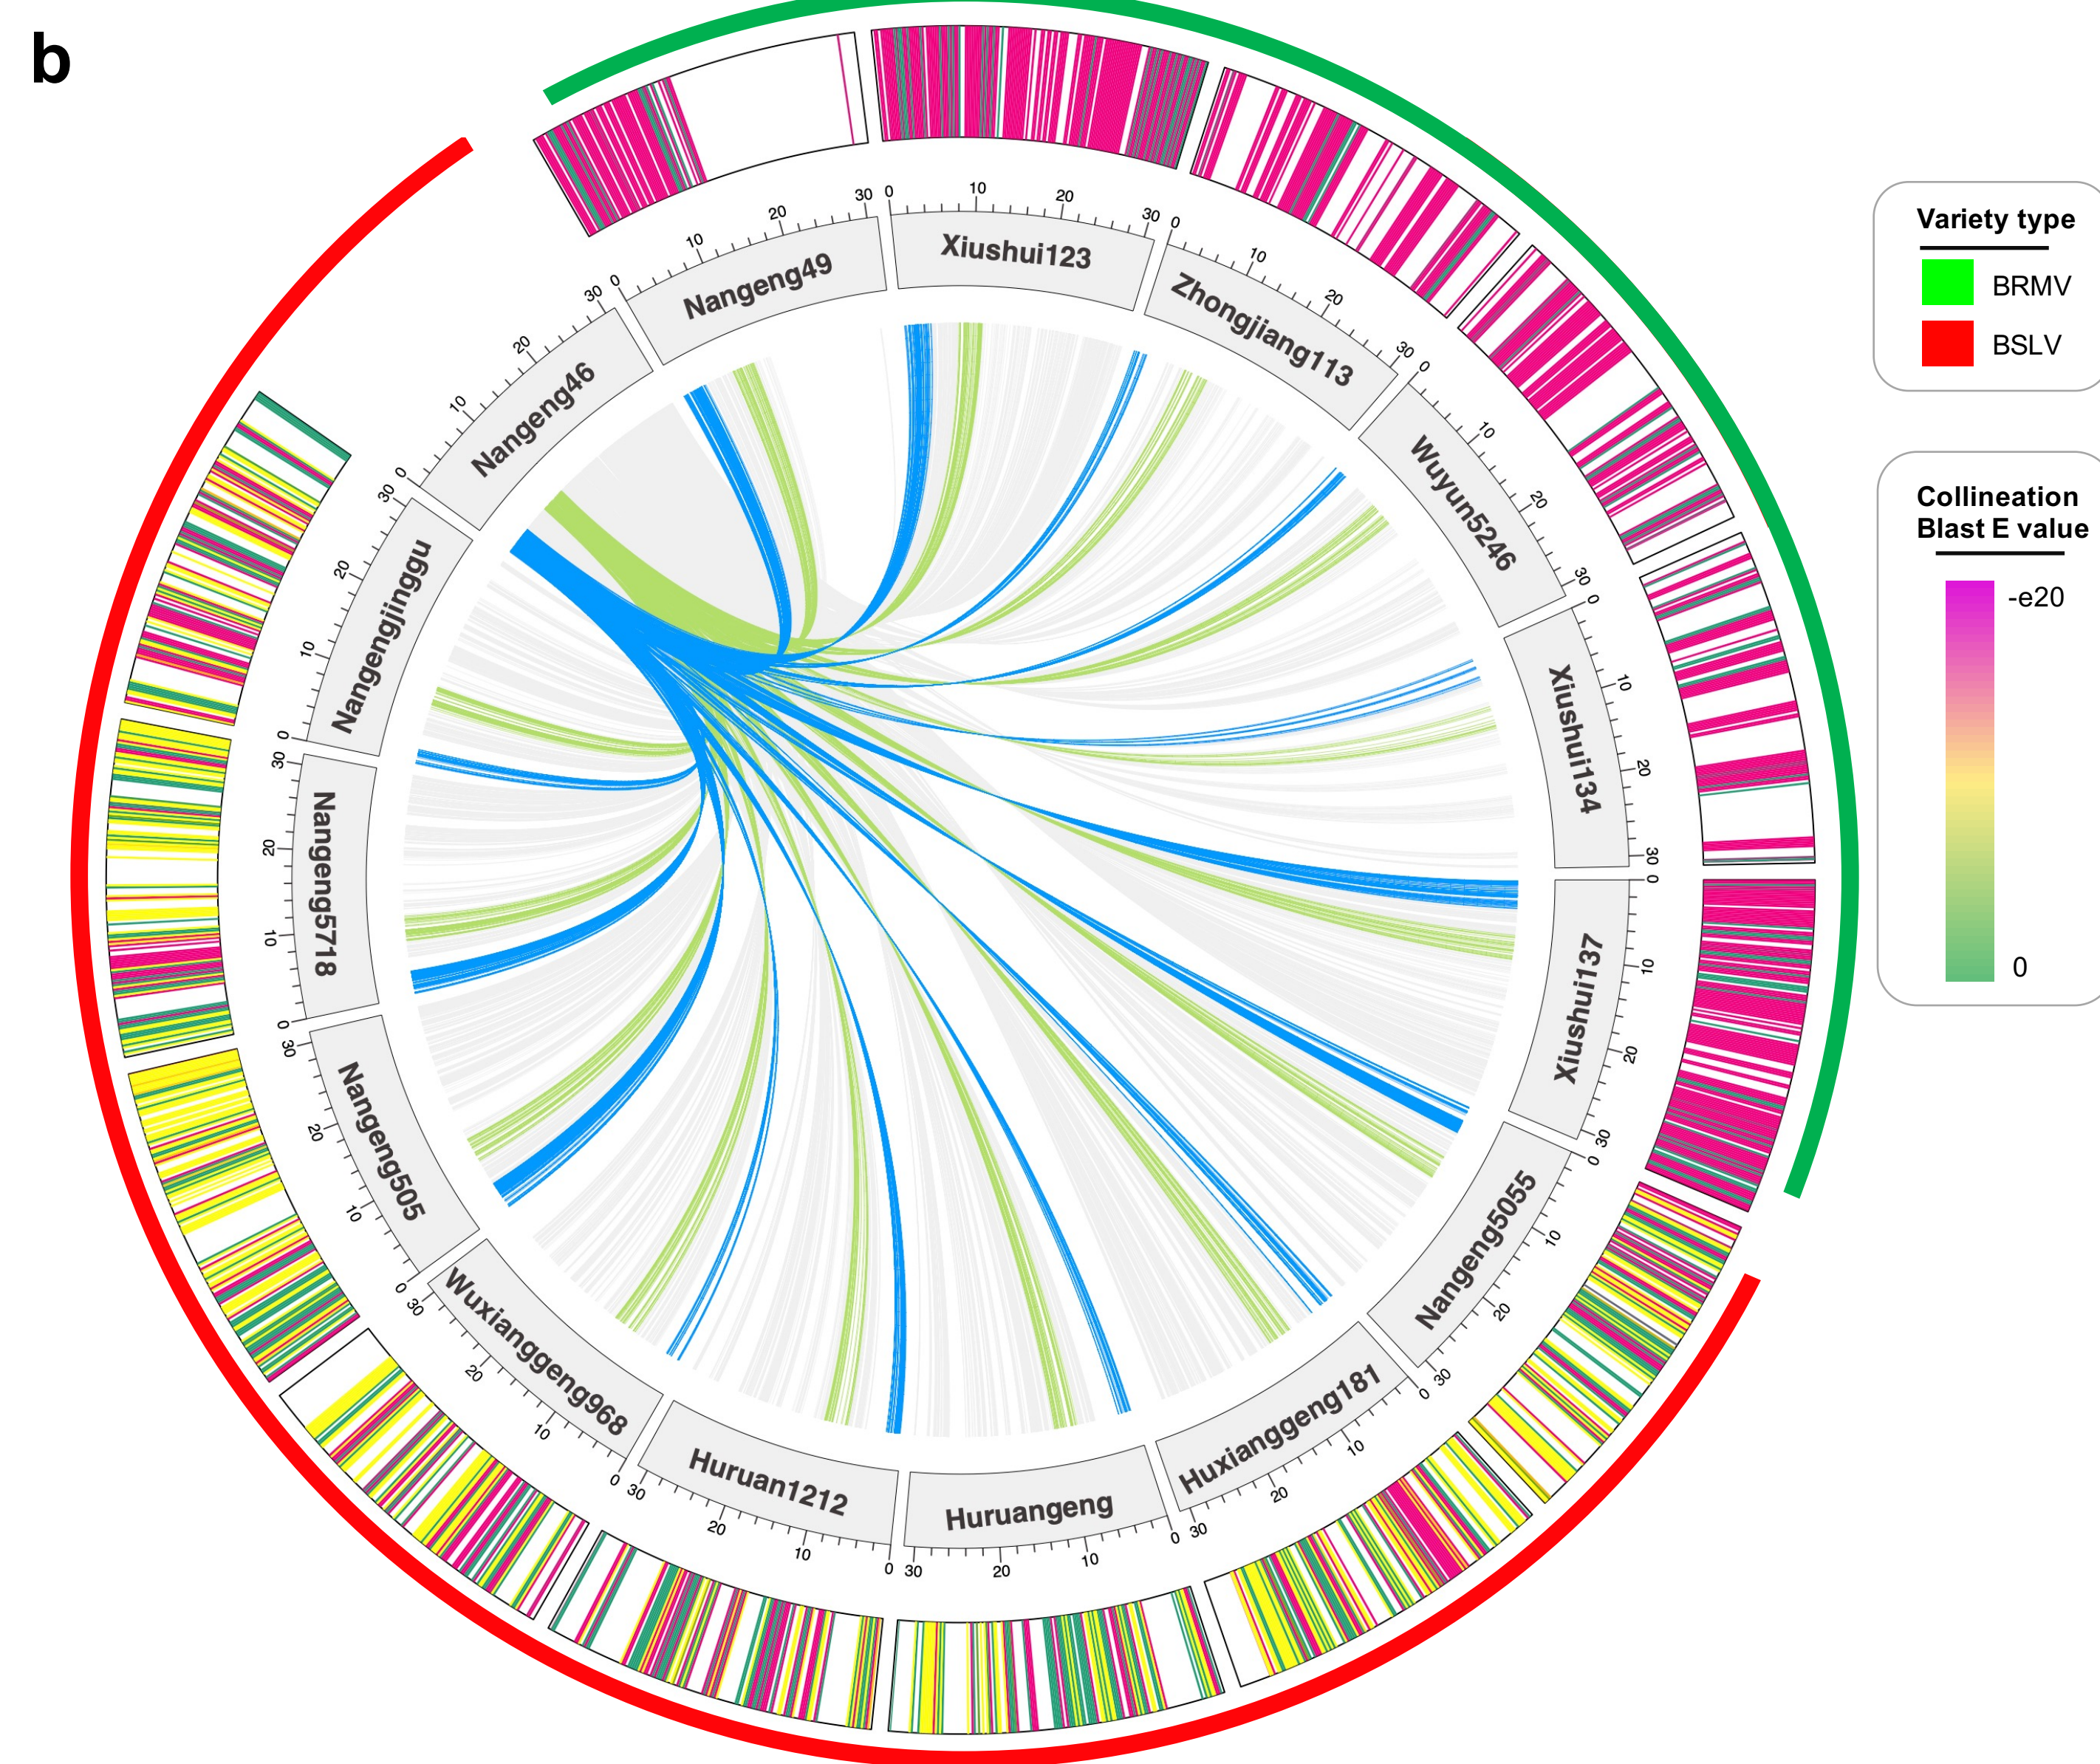

**Fig. S9 BSLVs show similarity of genomic structure on chromosome 6**

**a** Comparison of the genetic structure of chromosome 6 between BSLVs and BRMVs. The blank stretches indicate that the varieties have a genetic structure similar to that of Nangeng46. Different colors represent the SNP density per 10 kb. The neighbor-joining tree lines of light green, red, dark green, and blue present the BSLVs, and purple and light yellow represent BRMVs. **b** The degree of genome collinearity of representative BSLVs (Nangengjingu, Nangeng5718, Nangeng505, Nangeng5055, Wuxianggeng968, Huruan1212, and Huxianggeng181) and BRMVs (Nangeng49/Ning74121, Xiushui123/Bing03-123, Zhongjiang113, Wuyun5246, Xiushui134/Bing06-134), and Xiushui137). The *P*-value of BLAST in each unit (200 kb) indicates the degree of similarity of chromosome fragments between each variety. BSLVs; blast-sensitive and low-amylose (8–12%) varieties. BRMVs; blast-resistant and medium-amylose (13–18%) varieties. BSMVs; blast-sensitive, and medium-amylose (13–18%) varieties. Inner blue and green lines represent the regions that contain the *Wx* and *Piz* loci, respectively. The blue lines cover the 0–4 Mb region and the green lines cover the 8–12 Mb region on chromosome 6.



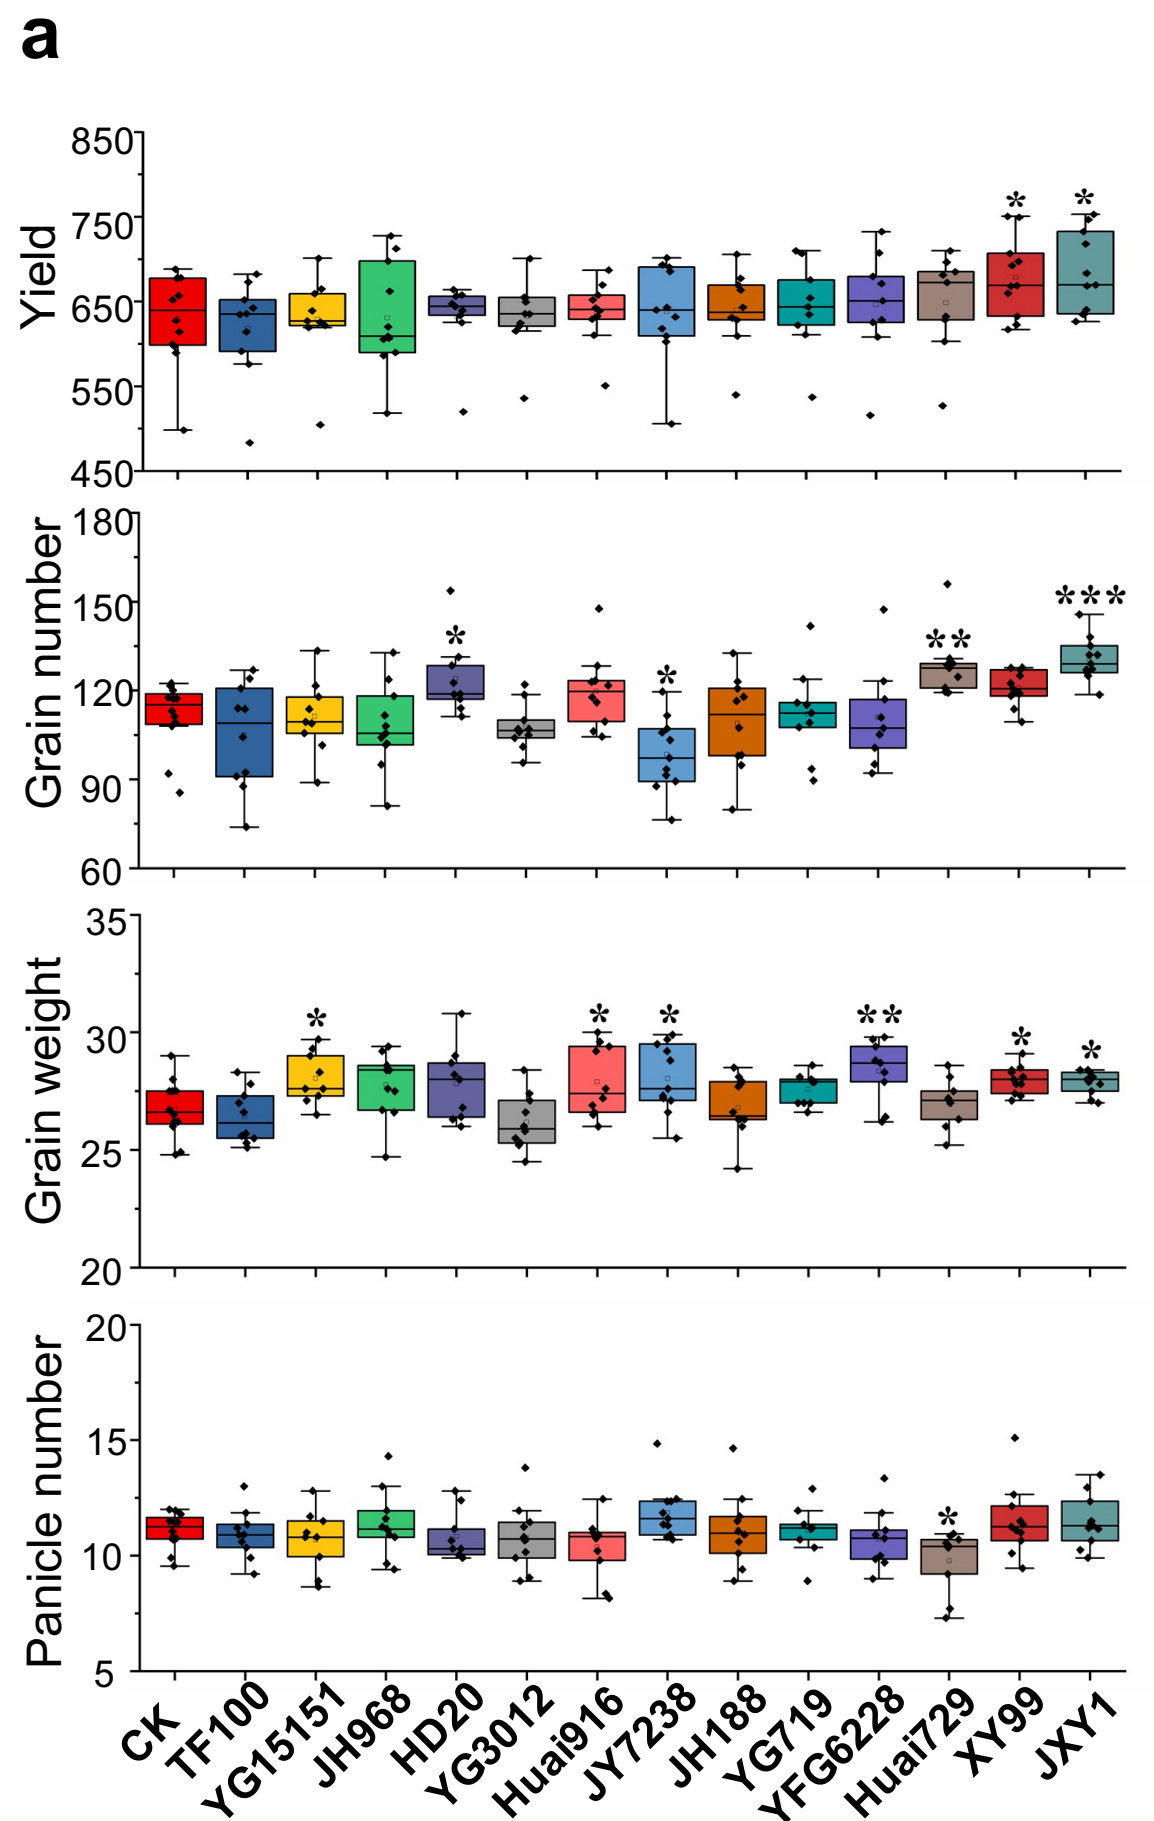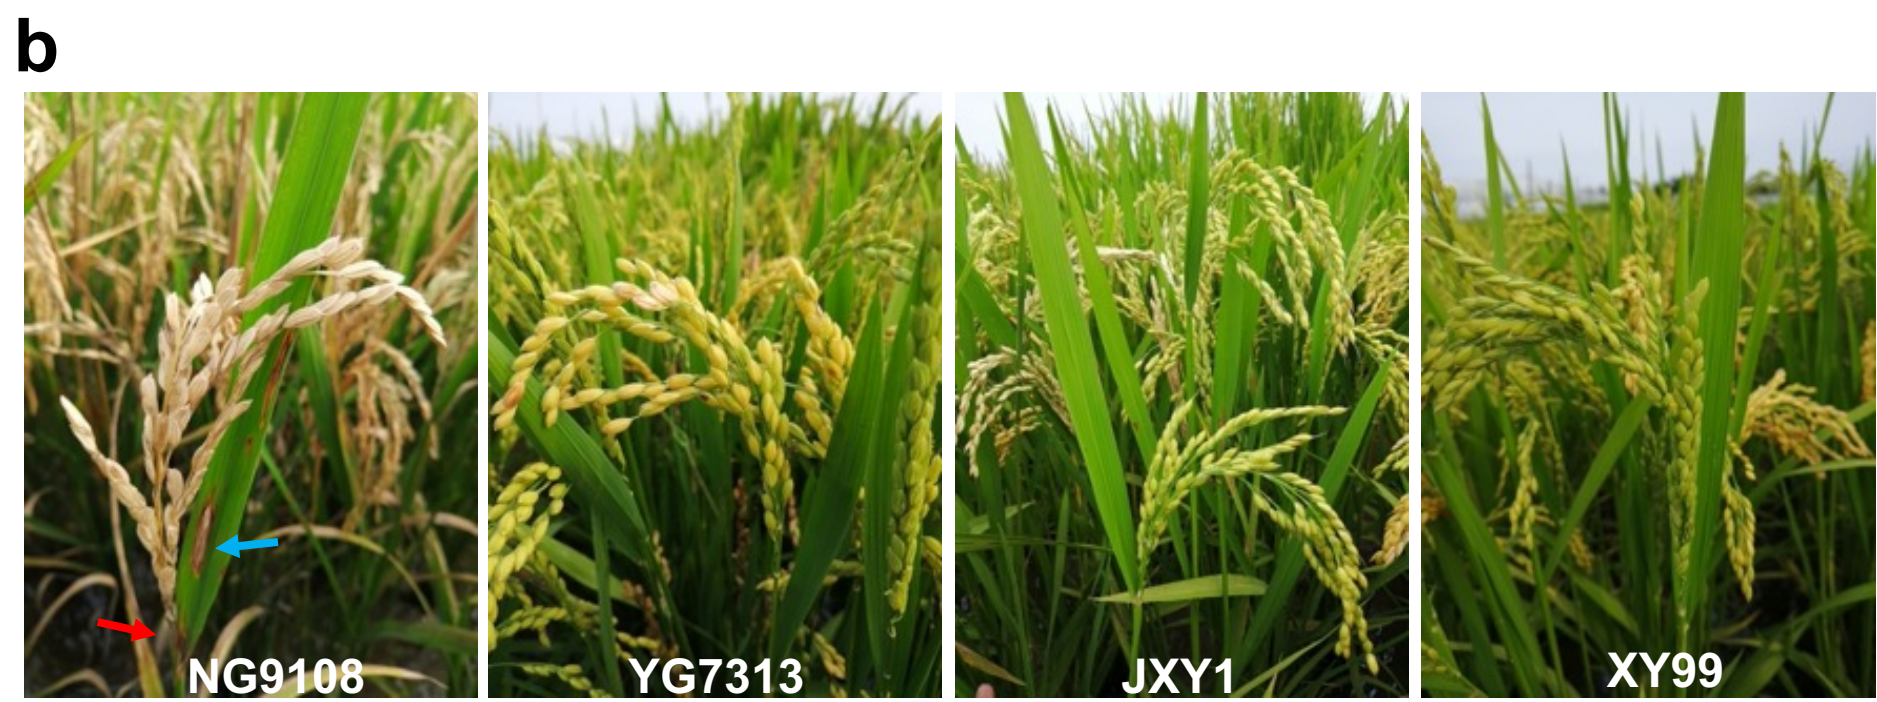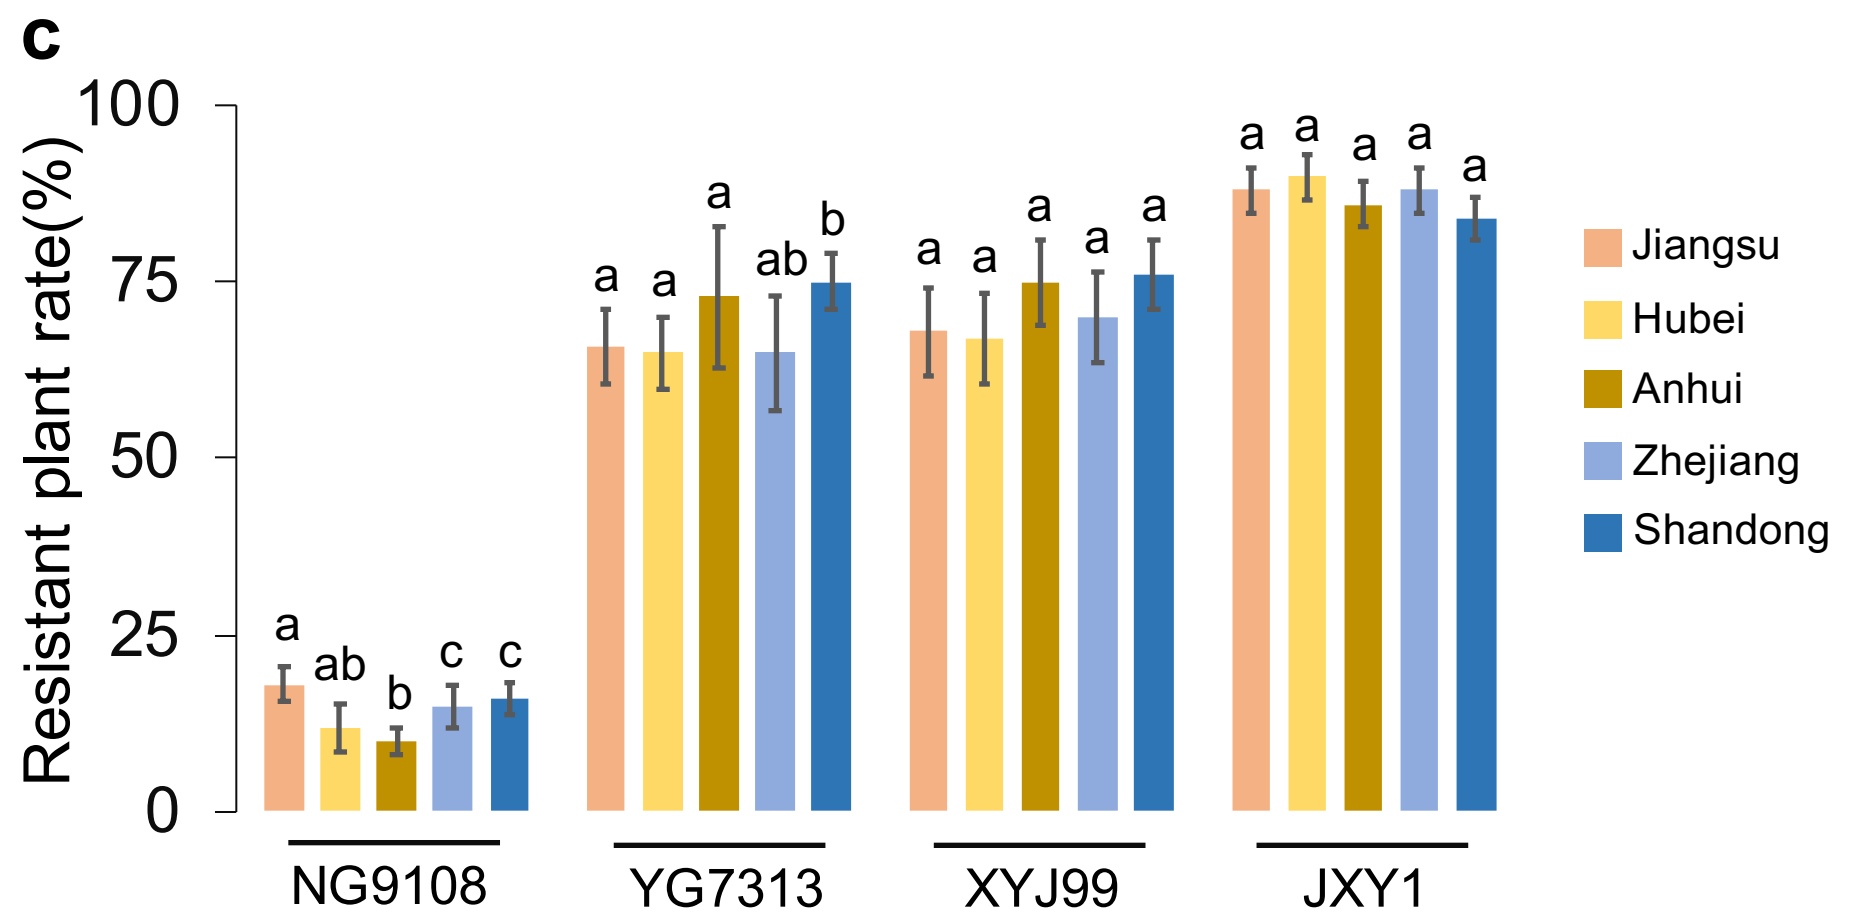

**Fig. S10 JXY1 and XY99 showed high-yield and broad-spectrum blast resistance**

**a** Comparisons of yield traits among XY99, JXY1 and other lines. \* indicates  $P < 0.05$  and \*\* indicates  $P < 0.01$  in student's  $t$ -test between selected lines and control (Huaidao5). **b** Phenotypes of NG9108, YG7313, XY99, and JXY1 at mature stage under natural growth conditions. The red arrow represents the neck blast site, and the blue arrow signifies the typical susceptibility spot on the flag leaf. **c** Percentage of blast resistant plants in NG9108, YG7313, XY99, and JXY1 grown under natural conditions in five different provinces in Central China. Different letters indicate significant differences ( $P < 0.05$  by Tukey's HSD test).
